# Supplementary material for: clrDV: A differential variability test for RNA-Seq data based on the skew-normal distribution
Source: bioRxiv preprint, doi:10.1101/2022.09.25.508885, version 1 (2022-09-27)
Supplement: Supplementary Table 2 [file 508885_file03.xlsx]

## Sheet: sd_ratio < 1
	gene_symbol	SD_ratio	adjusted p-value
ENSG00000176165	FOXG1	0.276897	1.22519e-12
ENSG00000198883	PNMA5	0.31994	6.73061e-09
ENSG00000105376	ICAM5	0.325755	2.29884e-09
ENSG00000006116	CACNG3	0.329913	6.73061e-09
ENSG00000214425	LRRC37A4P	0.343209	6.73061e-09
ENSG00000273540	AGBL1	0.345489	2.95225e-08
ENSG00000133101	CCNA1	0.347448	8.50727e-09
ENSG00000138207	RBP4	0.350578	1.93819e-08
ENSG00000147041	SYTL5	0.354343	2.85139e-08
ENSG00000129990	SYT5	0.355912	2.99027e-08
ENSG00000187094	CCK	0.35898	2.85139e-08
ENSG00000129682	FGF13	0.359772	7.34515e-09
ENSG00000236668	AC006450.3	0.36347	2.99027e-08
ENSG00000134343	ANO3	0.364322	1.49855e-08
ENSG00000169884	WNT10B	0.367237	2.99027e-08
ENSG00000181418	DDN	0.369116	2.85139e-08
ENSG00000132026	RTBDN	0.374177	9.12169e-08
ENSG00000131187	F12	0.375593	7.54812e-08
ENSG00000119782	FKBP1B	0.376787	9.12169e-08
ENSG00000239911	PRKAG2-AS1	0.379736	1.68359e-07
ENSG00000113100	CDH9	0.380865	2.02507e-08
ENSG00000178773	CPNE7	0.381171	8.90419e-08
ENSG00000259964	THSD4-AS1	0.381281	7.65038e-08
ENSG00000185149	NPY2R	0.384569	1.22707e-07
ENSG00000178531	CTXN1	0.386453	1.3767e-07
ENSG00000261340	LINC01616	0.386499	1.43109e-07
ENSG00000103528	SYT17	0.387609	2.14228e-07
ENSG00000104888	SLC17A7	0.388539	1.81684e-07
ENSG00000249436	AC008780.2	0.388978	9.12169e-08
ENSG00000164112	TMEM155	0.389528	2.48663e-07
ENSG00000115194	SLC30A3	0.391035	1.3767e-07
ENSG00000154146	NRGN	0.39108	1.43109e-07
ENSG00000129951	PLPPR3	0.391349	2.35458e-07
ENSG00000136535	TBR1	0.391389	9.12169e-08
ENSG00000250579	AC022424.1	0.394037	4.36127e-08
ENSG00000135625	EGR4	0.394091	9.12169e-08
ENSG00000132821	VSTM2L	0.3975	3.10215e-07
ENSG00000186297	GABRA5	0.397573	1.3925e-07
ENSG00000105419	MEIS3	0.397596	2.76882e-07
ENSG00000183654	MARCH11	0.399168	9.12169e-08
ENSG00000255301	AP002893.1	0.400167	3.92096e-07
ENSG00000176956	LY6H	0.400623	2.26104e-07
ENSG00000112183	RBM24	0.403318	4.96487e-07
ENSG00000074317	SNCB	0.403528	4.15827e-07
ENSG00000161082	CELF5	0.403599	3.76739e-07
ENSG00000145451	GLRA3	0.404975	6.51975e-07
ENSG00000171617	ENC1	0.404979	1.81684e-07
ENSG00000169427	KCNK9	0.405453	1.3767e-07
ENSG00000237732	AC010980.1	0.405554	3.76739e-07
ENSG00000233508	AL021395.1	0.40632	2.26104e-07
ENSG00000267034	AC010980.2	0.406732	4.6541e-07
ENSG00000196353	CPNE4	0.407739	3.76739e-07
ENSG00000179388	EGR3	0.408327	3.88226e-07
ENSG00000249550	LINC01234	0.409752	2.33954e-07
ENSG00000150459	SAP18	0.410056	8.72047e-07
ENSG00000008056	SYN1	0.41007	2.25744e-07
ENSG00000223572	CKMT1A	0.410713	7.24321e-07
ENSG00000164794	KCNV1	0.411242	3.37942e-07
ENSG00000159409	CELF3	0.411381	5.80596e-07
ENSG00000182870	GALNT9	0.411776	5.36739e-07
ENSG00000141668	CBLN2	0.413329	9.21117e-07
ENSG00000139200	PIANP	0.41388	1.07456e-06
ENSG00000132639	SNAP25	0.414096	7.18826e-07
ENSG00000183186	C2CD4C	0.415448	5.80596e-07
ENSG00000171450	CDK5R2	0.416474	1.00916e-06
ENSG00000169758	TMEM266	0.417043	3.03843e-07
ENSG00000126733	DACH2	0.417399	3.97425e-07
ENSG00000267890	AC010624.2	0.417798	4.05041e-07
ENSG00000186907	RTN4RL2	0.41824	9.44494e-07
ENSG00000171303	KCNK3	0.418673	6.51975e-07
ENSG00000162706	CADM3	0.418961	1.09667e-06
ENSG00000165983	PTER	0.418996	5.46544e-07
ENSG00000168135	KCNJ4	0.41907	9.44494e-07
ENSG00000103154	NECAB2	0.419076	1.22855e-06
ENSG00000272327	ENSG00000272327	0.419443	1.90899e-06
ENSG00000163032	VSNL1	0.419526	1.31276e-06
ENSG00000188674	C2orf80	0.42026	8.37673e-07
ENSG00000175772	LINC01106	0.420362	9.21117e-07
ENSG00000126583	PRKCG	0.421077	1.50427e-06
ENSG00000223812	AC073365.1	0.421084	1.0406e-06
ENSG00000004848	ARX	0.42113	5.46844e-07
ENSG00000117069	ST6GALNAC5	0.421859	4.15827e-07
ENSG00000259823	LYPD8	0.422556	1.10838e-06
ENSG00000143674	MAP3K21	0.422793	8.95978e-07
ENSG00000225670	CADM3-AS1	0.423082	1.85864e-06
ENSG00000162951	LRRTM1	0.424071	1.58885e-06
ENSG00000279090	AP000843.1	0.424112	1.64254e-06
ENSG00000133019	CHRM3	0.424758	1.08592e-06
ENSG00000260838	AC022893.2	0.425538	4.7535e-06
ENSG00000077152	UBE2T	0.425655	2.42535e-06
ENSG00000166006	KCNC2	0.425792	7.52535e-07
ENSG00000233532	LINC00460	0.425958	1.90944e-06
ENSG00000185290	NUPR2	0.425992	5.9513e-06
ENSG00000110786	PTPN5	0.427456	1.33549e-05
ENSG00000060709	RIMBP2	0.428214	1.29965e-05
ENSG00000144834	TAGLN3	0.428309	5.14226e-06
ENSG00000186377	CYP4X1	0.429148	1.03982e-06
ENSG00000135426	TESPA1	0.42954	8.72047e-07
ENSG00000155511	GRIA1	0.429615	2.0215e-06
ENSG00000106537	TSPAN13	0.429896	1.72984e-06
ENSG00000140284	SLC27A2	0.431203	2.18993e-06
ENSG00000169900	PYDC1	0.431311	4.52908e-06
ENSG00000204950	LRRC10B	0.431693	1.90899e-06
ENSG00000128656	CHN1	0.431714	7.51258e-07
ENSG00000070808	CAMK2A	0.43317	1.21479e-06
ENSG00000010438	PRSS3	0.434106	2.74093e-06
ENSG00000127585	FBXL16	0.434417	1.62277e-06
ENSG00000091137	SLC26A4	0.434526	2.42535e-06
ENSG00000172995	ARPP21	0.434692	1.44424e-06
ENSG00000119866	BCL11A	0.435353	1.90899e-06
ENSG00000119125	GDA	0.435556	1.09325e-06
ENSG00000236268	LINC01361	0.435565	8.75076e-07
ENSG00000172020	GAP43	0.435836	2.3074e-06
ENSG00000272398	CD24	0.436112	1.58885e-06
ENSG00000179673	RPRML	0.436853	5.4727e-06
ENSG00000145632	PLK2	0.4379	3.92825e-06
ENSG00000091664	SLC17A6	0.438064	1.58885e-06
ENSG00000156298	TSPAN7	0.438293	3.87929e-06
ENSG00000117152	RGS4	0.439126	1.85864e-06
ENSG00000228971	AL356479.1	0.439404	1.54263e-06
ENSG00000260500	AC010336.2	0.439478	1.47625e-06
ENSG00000118432	CNR1	0.439856	1.70677e-06
ENSG00000176788	BASP1	0.43992	2.61514e-06
ENSG00000233705	SLC26A4-AS1	0.439973	1.66131e-06
ENSG00000167754	KLK5	0.441158	1.03951e-05
ENSG00000112186	CAP2	0.441501	3.52182e-06
ENSG00000156502	SUPV3L1	0.441753	2.27803e-06
ENSG00000171509	RXFP1	0.442085	1.79154e-06
ENSG00000070729	CNGB1	0.442506	1.08011e-05
ENSG00000248441	LINC01197	0.442507	3.36773e-06
ENSG00000172209	GPR22	0.442581	3.9517e-06
ENSG00000216863	LY86-AS1	0.442913	1.85864e-06
ENSG00000060140	STYK1	0.44346	2.62912e-06
ENSG00000147642	SYBU	0.443816	3.29793e-06
ENSG00000185760	KCNQ5	0.444044	2.30045e-06
ENSG00000173930	SLCO4C1	0.444494	1.90941e-06
ENSG00000133985	TTC9	0.444679	5.12208e-06
ENSG00000077080	ACTL6B	0.445056	5.12208e-06
ENSG00000205035	AC136759.1	0.445513	2.87053e-06
ENSG00000272479	AC010857.1	0.445548	3.52182e-06
ENSG00000024862	CCDC28A	0.445673	2.31831e-06
ENSG00000253368	TRNP1	0.445898	3.94936e-05
ENSG00000230006	ANKRD36BP2	0.445915	1.43175e-05
ENSG00000143340	FAM163A	0.446034	1.03951e-05
ENSG00000184672	RALYL	0.446108	2.61514e-06
ENSG00000260025	AC009414.2	0.44649	1.94493e-06
ENSG00000169744	LDB2	0.446834	2.37925e-06
ENSG00000102468	HTR2A	0.447027	5.15649e-06
ENSG00000105202	FBL	0.447114	5.86483e-06
ENSG00000228620	Z97056.1	0.447576	6.09838e-06
ENSG00000133169	BEX1	0.448478	9.72266e-06
ENSG00000196557	CACNA1H	0.448553	5.23737e-06
ENSG00000198108	CHSY3	0.44857	6.59241e-06
ENSG00000184185	KCNJ12	0.448653	1.00916e-06
ENSG00000109158	GABRA4	0.449019	7.24034e-06
ENSG00000273419	AC004877.1	0.449453	2.40352e-06
ENSG00000130032	PRRG3	0.449612	3.52227e-06
ENSG00000136928	GABBR2	0.449806	5.14218e-06
ENSG00000054803	CBLN4	0.449982	4.25649e-06
ENSG00000214842	RAD51AP2	0.45021	4.60664e-06
ENSG00000157214	STEAP2	0.450374	1.71862e-06
ENSG00000267448	AC010649.1	0.450484	3.13963e-06
ENSG00000168748	CA7	0.450914	2.95368e-06
ENSG00000156140	ADAMTS3	0.450921	3.52182e-06
ENSG00000164604	GPR85	0.451433	2.40352e-06
ENSG00000148798	INA	0.451442	6.22578e-06
ENSG00000165995	CACNB2	0.451445	3.8153e-06
ENSG00000123977	DAW1	0.451819	7.63905e-06
ENSG00000240204	SMKR1	0.45225	1.38294e-05
ENSG00000132535	DLG4	0.452359	7.61303e-06
ENSG00000154096	THY1	0.452618	7.7869e-06
ENSG00000124203	ZNF831	0.452698	9.38229e-06
ENSG00000260412	AL353746.1	0.452911	5.12208e-06
ENSG00000265579	AC023301.1	0.453149	3.07584e-06
ENSG00000182674	KCNB2	0.4533	4.66216e-06
ENSG00000263878	DLGAP1-AS4	0.453549	6.55155e-06
ENSG00000130643	CALY	0.453869	6.41001e-06
ENSG00000242428	C3orf67-AS1	0.453981	4.76029e-06
ENSG00000167550	RHEBL1	0.454211	1.36857e-05
ENSG00000086300	SNX10	0.454883	8.15355e-06
ENSG00000124249	KCNK15	0.455786	3.85269e-06
ENSG00000110148	CCKBR	0.455948	9.67162e-06
ENSG00000135333	EPHA7	0.455969	9.53795e-06
ENSG00000084072	PPIE	0.456487	1.01362e-05
ENSG00000121769	FABP3	0.456515	1.12786e-05
ENSG00000260001	TGFBR3L	0.456639	7.61303e-06
ENSG00000139988	RDH12	0.456858	7.82365e-06
ENSG00000273301	AC016717.2	0.45731	4.30079e-06
ENSG00000007264	MATK	0.457696	6.09838e-06
ENSG00000167535	CACNB3	0.457768	6.55155e-06
ENSG00000170396	ZNF804A	0.457826	1.10298e-05
ENSG00000233542	AL391845.2	0.458245	2.66162e-06
ENSG00000171126	KCNG3	0.458461	1.37153e-05
ENSG00000156642	NPTN	0.458537	9.38229e-06
ENSG00000213190	MLLT11	0.458749	1.08011e-05
ENSG00000166073	GPR176	0.458782	9.67162e-06
ENSG00000254377	MIR124-2HG	0.459034	5.86483e-06
ENSG00000224223	VSTM2A-OT1	0.459039	1.0371e-05
ENSG00000087460	GNAS	0.459611	1.03173e-05
ENSG00000272636	DOC2B	0.459934	6.09838e-06
ENSG00000152822	GRM1	0.460324	1.09415e-05
ENSG00000260196	AC124798.1	0.460336	3.61596e-06
ENSG00000226852	ENSG00000226852	0.460493	3.83649e-05
ENSG00000150054	MPP7	0.460586	1.18492e-05
ENSG00000135439	AGAP2	0.460608	5.46083e-06
ENSG00000127561	SYNGR3	0.460657	9.5742e-06
ENSG00000092051	JPH4	0.460671	9.17308e-06
ENSG00000260941	LINC00622	0.460809	2.09884e-05
ENSG00000147676	MAL2	0.46107	8.15355e-06
ENSG00000138944	SHISAL1	0.461346	3.58779e-06
ENSG00000179774	ATOH7	0.461357	8.13274e-06
ENSG00000164128	NPY1R	0.461607	1.04117e-05
ENSG00000196639	HRH1	0.46173	1.71954e-05
ENSG00000163618	CADPS	0.461915	1.81251e-05
ENSG00000115756	HPCAL1	0.461922	2.81898e-06
ENSG00000196368	NUDT11	0.462235	9.5742e-06
ENSG00000125170	DOK4	0.462464	5.68563e-06
ENSG00000059915	PSD	0.462548	1.24364e-05
ENSG00000167642	SPINT2	0.462885	2.00773e-05
ENSG00000047849	MAP4	0.462965	1.09415e-05
ENSG00000214944	ARHGEF28	0.462977	2.34559e-05
ENSG00000221823	PPP3R1	0.464191	4.05066e-05
ENSG00000158747	NBL1	0.464244	1.23282e-05
ENSG00000141655	TNFRSF11A	0.46432	6.55155e-06
ENSG00000174521	TTC9B	0.46445	7.7869e-06
ENSG00000135638	EMX1	0.464731	6.55155e-06
ENSG00000173267	SNCG	0.464824	1.97887e-05
ENSG00000165379	LRFN5	0.465013	8.91191e-06
ENSG00000171532	NEUROD2	0.465022	8.11423e-06
ENSG00000066248	NGEF	0.465122	1.20137e-05
ENSG00000134369	NAV1	0.465339	2.37314e-06
ENSG00000070501	POLB	0.465484	7.61303e-06
ENSG00000135519	KCNH3	0.465817	7.63905e-06
ENSG00000279496	ENSG00000279496	0.465963	1.23222e-05
ENSG00000253633	AP002852.1	0.46626	1.09415e-05
ENSG00000029153	ARNTL2	0.466339	1.81956e-05
ENSG00000167281	RBFOX3	0.466586	1.10298e-05
ENSG00000142549	IGLON5	0.467126	4.8401e-06
ENSG00000186469	GNG2	0.467289	5.8749e-06
ENSG00000272321	AP003355.2	0.467322	6.09838e-06
ENSG00000276462	BX255923.2	0.467413	1.3383e-05
ENSG00000154277	UCHL1	0.467758	2.16802e-05
ENSG00000183578	TNFAIP8L3	0.46776	2.04989e-05
ENSG00000011638	TMEM159	0.467819	0.000102758
ENSG00000196872	KIAA1211L	0.468311	1.03572e-05
ENSG00000067715	SYT1	0.468438	1.56374e-05
ENSG00000174951	FUT1	0.46859	1.04054e-05
ENSG00000180777	ANKRD30B	0.468668	3.4517e-05
ENSG00000273238	AC116565.1	0.46877	1.33549e-05
ENSG00000136267	DGKB	0.468933	3.76552e-05
ENSG00000168539	CHRM1	0.468942	1.7179e-05
ENSG00000174871	CNIH2	0.468997	1.4772e-05
ENSG00000155966	AFF2	0.469019	1.70231e-05
ENSG00000174145	NWD2	0.469221	1.9234e-05
ENSG00000117600	PLPPR4	0.469242	1.52054e-05
ENSG00000179841	AKAP5	0.469409	1.59058e-05
ENSG00000279322	AL035252.4	0.469501	3.30919e-06
ENSG00000257434	AC073525.1	0.469671	9.71993e-06
ENSG00000161647	MPP3	0.469707	7.63905e-06
ENSG00000105696	TMEM59L	0.470067	1.97712e-05
ENSG00000011677	GABRA3	0.470268	1.74985e-05
ENSG00000170214	ADRA1B	0.470278	1.23282e-05
ENSG00000163630	SYNPR	0.470433	1.23222e-05
ENSG00000077044	DGKD	0.470753	2.09287e-05
ENSG00000189181	OR14I1	0.470923	4.8483e-05
ENSG00000011083	SLC6A7	0.471118	1.37153e-05
ENSG00000104435	STMN2	0.471147	1.46037e-05
ENSG00000145920	CPLX2	0.471761	1.42905e-05
ENSG00000077264	PAK3	0.471812	1.65633e-05
ENSG00000166448	TMEM130	0.472077	1.85584e-05
ENSG00000107954	NEURL1	0.47221	1.65783e-05
ENSG00000179520	SLC17A8	0.472305	1.74393e-05
ENSG00000177679	SRRM3	0.472555	7.86103e-06
ENSG00000272551	AC017048.3	0.472784	1.44824e-05
ENSG00000203618	GP1BB	0.472896	8.91191e-06
ENSG00000152503	TRIM36	0.472937	1.81952e-05
ENSG00000165704	HPRT1	0.473013	2.00773e-05
ENSG00000182901	RGS7	0.473175	1.43175e-05
ENSG00000178860	MSC	0.473225	2.3001e-05
ENSG00000136158	SPRY2	0.473329	9.67162e-06
ENSG00000180332	KCTD4	0.473445	2.56817e-05
ENSG00000272157	AC107373.2	0.473883	1.31349e-05
ENSG00000170419	VSTM2A	0.474033	1.85517e-05
ENSG00000134072	CAMK1	0.474144	2.33991e-05
ENSG00000107518	ATRNL1	0.474161	0.000103734
ENSG00000186960	LINC01551	0.474513	1.3383e-05
ENSG00000106367	AP1S1	0.474563	7.15901e-06
ENSG00000145864	GABRB2	0.474711	2.9017e-05
ENSG00000187730	GABRD	0.475036	1.41934e-05
ENSG00000170091	NSG2	0.475072	1.99234e-05
ENSG00000086506	HBQ1	0.47525	1.4772e-05
ENSG00000104044	OCA2	0.475464	2.14991e-05
ENSG00000259834	AL365361.1	0.475875	1.88762e-05
ENSG00000182566	CLEC4G	0.476052	1.26899e-05
ENSG00000225953	SATB2-AS1	0.476233	1.75974e-05
ENSG00000070159	PTPN3	0.476432	1.792e-05
ENSG00000095752	IL11	0.476496	9.38229e-06
ENSG00000101188	NTSR1	0.476673	1.88649e-05
ENSG00000183576	SETD3	0.476731	2.00773e-05
ENSG00000102003	SYP	0.476816	3.89335e-05
ENSG00000104679	R3HCC1	0.477369	2.96533e-05
ENSG00000136238	RAC1	0.477524	3.50376e-05
ENSG00000136153	LMO7	0.477567	1.08011e-05
ENSG00000174482	LINGO2	0.478104	6.98299e-06
ENSG00000260391	AC022336.2	0.478147	8.70335e-05
ENSG00000003756	RBM5	0.478175	6.55155e-06
ENSG00000149972	CNTN5	0.478383	2.39966e-05
ENSG00000117598	PLPPR5	0.478385	2.18169e-05
ENSG00000157152	SYN2	0.478833	2.79783e-05
ENSG00000278978	AC092611.3	0.478867	5.17179e-06
ENSG00000237187	NR2F1-AS1	0.479083	2.98638e-05
ENSG00000114423	CBLB	0.479114	2.70642e-05
ENSG00000196730	DAPK1	0.479146	2.34559e-05
ENSG00000186010	NDUFA13	0.479186	4.8483e-05
ENSG00000263873	AP003396.5	0.479242	3.65492e-05
ENSG00000258757	AL133453.1	0.479367	3.4517e-05
ENSG00000101210	EEF1A2	0.479862	1.74985e-05
ENSG00000105143	SLC1A6	0.480397	2.27165e-05
ENSG00000166596	CFAP52	0.48056	3.48832e-05
ENSG00000134709	HOOK1	0.480694	3.55353e-05
ENSG00000198598	MMP17	0.480938	1.37153e-05
ENSG00000166526	ZNF3	0.480964	4.8277e-05
ENSG00000091592	NLRP1	0.481016	3.42717e-05
ENSG00000237289	CKMT1B	0.481285	1.84669e-05
ENSG00000187109	NAP1L1	0.481316	3.40697e-05
ENSG00000250366	TUNAR	0.481449	2.53871e-05
ENSG00000112053	SLC26A8	0.481506	1.94956e-05
ENSG00000106976	DNM1	0.481672	2.20489e-05
ENSG00000160408	ST6GALNAC6	0.481728	1.10298e-05
ENSG00000144331	ZNF385B	0.481837	3.76552e-05
ENSG00000159335	PTMS	0.481875	1.3739e-05
ENSG00000132849	PATJ	0.481899	1.65633e-05
ENSG00000049759	NEDD4L	0.482094	3.46988e-05
ENSG00000270111	AL583859.2	0.482182	5.26192e-05
ENSG00000138100	TRIM54	0.48263	2.2461e-05
ENSG00000165186	PTCHD1	0.482664	9.38229e-06
ENSG00000129911	KLF16	0.482714	1.4355e-05
ENSG00000022355	GABRA1	0.482728	3.83649e-05
ENSG00000124140	SLC12A5	0.482965	5.47487e-05
ENSG00000237522	NONOP2	0.483099	1.99234e-05
ENSG00000235026	DPP10-AS1	0.483121	3.75444e-05
ENSG00000184900	SUMO3	0.483352	7.7869e-06
ENSG00000272515	AL355578.1	0.483417	3.47567e-05
ENSG00000146374	RSPO3	0.484005	4.89843e-05
ENSG00000185070	FLRT2	0.48402	0.000273627
ENSG00000162374	ELAVL4	0.484212	1.8883e-05
ENSG00000117650	NEK2	0.484235	7.42632e-05
ENSG00000149742	SLC22A9	0.484305	2.70059e-05
ENSG00000188573	FBLL1	0.484346	7.05225e-05
ENSG00000054277	OPN3	0.484374	0.000134896
ENSG00000133665	DYDC2	0.484437	3.47567e-05
ENSG00000128245	YWHAH	0.48474	4.89659e-05
ENSG00000259168	AC104002.3	0.485424	4.15935e-05
ENSG00000107829	FBXW4	0.485507	4.8483e-05
ENSG00000156299	TIAM1	0.485555	1.78014e-05
ENSG00000114948	ADAM23	0.485579	5.0012e-05
ENSG00000182230	FAM153B	0.485639	2.56817e-05
ENSG00000124493	GRM4	0.485665	8.15355e-06
ENSG00000186462	NAP1L2	0.485751	2.70642e-05
ENSG00000136546	SCN7A	0.48589	1.42905e-05
ENSG00000178965	ERICH3	0.48596	3.5221e-05
ENSG00000176204	LRRTM4	0.486373	6.33913e-05
ENSG00000188582	PAQR9	0.486651	5.27146e-05
ENSG00000196376	SLC35F1	0.486652	3.7505e-05
ENSG00000184702	SEPT5	0.486728	3.79965e-05
ENSG00000215218	UBE2QL1	0.486737	2.73656e-05
ENSG00000164828	SUN1	0.486976	1.81952e-05
ENSG00000165434	PGM2L1	0.486985	0.000279341
ENSG00000279042	AP005242.4	0.486996	4.2293e-05
ENSG00000151229	SLC2A13	0.487054	9.0482e-05
ENSG00000205531	NAP1L4	0.487289	3.80186e-05
ENSG00000163827	LRRC2	0.487419	7.60304e-05
ENSG00000245910	SNHG6	0.487957	2.4576e-05
ENSG00000172301	COPRS	0.488049	7.87975e-06
ENSG00000181004	BBS12	0.488208	2.73656e-05
ENSG00000117245	KIF17	0.488473	1.7179e-05
ENSG00000157219	HTR5A	0.488743	1.53629e-05
ENSG00000116299	KIAA1324	0.488743	5.15887e-05
ENSG00000102387	TAF7L	0.488831	4.27906e-05
ENSG00000168490	PHYHIP	0.488865	4.8483e-05
ENSG00000132323	ILKAP	0.48897	4.8483e-05
ENSG00000198010	DLGAP2	0.48897	1.77203e-05
ENSG00000118733	OLFM3	0.489026	5.23744e-05
ENSG00000261728	AL138690.1	0.48904	3.44443e-05
ENSG00000089199	CHGB	0.489106	5.88012e-05
ENSG00000179148	ALOXE3	0.489122	3.57963e-05
ENSG00000163624	CDS1	0.489184	4.27906e-05
ENSG00000011105	TSPAN9	0.489276	2.53982e-05
ENSG00000188186	LAMTOR4	0.48932	2.96142e-05
ENSG00000145592	RPL37	0.489351	2.79783e-05
ENSG00000185742	C11orf87	0.48948	6.12243e-05
ENSG00000183662	FAM19A1	0.489541	4.95558e-05
ENSG00000140280	LYSMD2	0.489596	4.95558e-05
ENSG00000100604	CHGA	0.489647	4.19923e-05
ENSG00000249992	TMEM158	0.489837	3.00698e-05
ENSG00000180720	CHRM4	0.489877	4.1657e-05
ENSG00000169020	ATP5ME	0.489921	4.69905e-05
ENSG00000129355	CDKN2D	0.490138	9.48397e-05
ENSG00000105258	POLR2I	0.490193	0.000114279
ENSG00000081189	MEF2C	0.490269	0.000522247
ENSG00000169035	KLK7	0.490285	3.99132e-05
ENSG00000084764	MAPRE3	0.490454	1.81251e-05
ENSG00000166736	HTR3A	0.490492	3.56359e-05
ENSG00000130558	OLFM1	0.490582	5.0012e-05
ENSG00000176749	CDK5R1	0.490672	4.04486e-05
ENSG00000107105	ELAVL2	0.490773	1.62525e-05
ENSG00000184368	MAP7D2	0.490791	6.12243e-05
ENSG00000182255	KCNA4	0.49096	3.34774e-05
ENSG00000103316	CRYM	0.491026	6.06997e-05
ENSG00000145428	RNF175	0.491134	6.33142e-05
ENSG00000164076	CAMKV	0.491143	4.27738e-05
ENSG00000136883	KIF12	0.491409	4.50598e-05
ENSG00000144583	MARCH4	0.491444	3.87113e-05
ENSG00000011347	SYT7	0.491528	3.79965e-05
ENSG00000169122	FAM110B	0.491603	2.90025e-05
ENSG00000157212	PAXIP1	0.491621	3.54167e-05
ENSG00000106689	LHX2	0.491822	3.76418e-05
ENSG00000268565	AC005339.1	0.491933	2.56817e-05
ENSG00000134744	ZCCHC11	0.492155	1.38744e-05
ENSG00000065609	SNAP91	0.49229	3.77459e-05
ENSG00000125817	CENPB	0.492303	2.07109e-05
ENSG00000224982	TMEM233	0.492391	4.8483e-05
ENSG00000228824	MIR4500HG	0.492469	6.07112e-05
ENSG00000169851	PCDH7	0.492527	6.81596e-05
ENSG00000182450	KCNK4	0.492652	4.8483e-05
ENSG00000189159	JPT1	0.492867	5.0012e-05
ENSG00000074803	SLC12A1	0.492913	6.77722e-05
ENSG00000181195	PENK	0.493102	1.53077e-05
ENSG00000235711	ANKRD34C	0.493538	5.15887e-05
ENSG00000129295	LRRC6	0.493604	9.38396e-05
ENSG00000168214	RBPJ	0.493832	7.14067e-05
ENSG00000166342	NETO1	0.494172	6.92461e-05
ENSG00000157005	SST	0.49418	8.99983e-05
ENSG00000259948	AC124068.1	0.494213	5.0012e-05
ENSG00000160963	COL26A1	0.494451	4.47783e-05
ENSG00000125966	MMP24	0.49451	3.13302e-05
ENSG00000105409	ATP1A3	0.494519	7.79215e-05
ENSG00000136819	C9orf78	0.494606	0.000225505
ENSG00000185352	HS6ST3	0.494739	6.26856e-05
ENSG00000169676	DRD5	0.49498	7.74832e-05
ENSG00000131788	PIAS3	0.495056	1.88762e-05
ENSG00000107295	SH3GL2	0.495505	4.59641e-05
ENSG00000186310	NAP1L3	0.495698	6.40446e-05
ENSG00000138741	TRPC3	0.495703	4.69905e-05
ENSG00000205659	LIN52	0.4958	3.56359e-05
ENSG00000164647	STEAP1	0.49582	3.28468e-05
ENSG00000213088	ACKR1	0.49585	1.70231e-05
ENSG00000082556	OPRK1	0.4961	5.92626e-05
ENSG00000278456	AC015712.7	0.496357	5.92718e-05
ENSG00000091129	NRCAM	0.496372	0.000154282
ENSG00000185924	RTN4RL1	0.496381	4.59641e-05
ENSG00000034510	TMSB10	0.496877	2.98344e-05
ENSG00000066032	CTNNA2	0.496931	7.41393e-05
ENSG00000120942	UBIAD1	0.497187	1.45041e-05
ENSG00000164588	HCN1	0.497281	7.86047e-05
ENSG00000198910	L1CAM	0.49733	6.37149e-05
ENSG00000019505	SYT13	0.497342	5.25322e-05
ENSG00000177542	SLC25A22	0.497422	8.8784e-05
ENSG00000102678	FGF9	0.49745	6.63686e-05
ENSG00000187672	ERC2	0.497454	7.43914e-05
ENSG00000178171	AMER3	0.497498	6.65688e-05
ENSG00000162817	C1orf115	0.49774	7.70015e-05
ENSG00000011478	QPCTL	0.497768	2.41216e-05
ENSG00000053372	MRTO4	0.497957	2.94184e-05
ENSG00000267466	AC021683.1	0.498095	5.86503e-05
ENSG00000145545	SRD5A1	0.498123	0.000159155
ENSG00000176769	TCERG1L	0.498351	7.12127e-05
ENSG00000147432	CHRNB3	0.498412	1.79234e-05
ENSG00000277586	NEFL	0.498534	0.000801529
ENSG00000174808	BTC	0.498629	3.34397e-05
ENSG00000267561	AC093155.3	0.498918	9.08308e-05
ENSG00000182010	RTKN2	0.498981	7.14663e-05
ENSG00000122824	NUDT10	0.499164	4.02352e-05
ENSG00000175264	CHST1	0.499197	4.95558e-05
ENSG00000157168	NRG1	0.499384	2.72864e-05
ENSG00000106089	STX1A	0.499424	8.93337e-05
ENSG00000146360	GPR6	0.499434	6.98088e-05
ENSG00000169258	GPRIN1	0.499677	6.96537e-05
ENSG00000008118	CAMK1G	0.499751	5.85131e-05
ENSG00000157368	IL34	0.499769	4.13013e-05
ENSG00000152128	TMEM163	0.499937	2.77523e-05
ENSG00000188191	PRKAR1B	0.499965	0.000108733
ENSG00000236064	AL034399.2	0.500035	9.08308e-05
ENSG00000177879	AP3S1	0.500125	0.000114276
ENSG00000203280	AL022323.1	0.500157	0.000111152
ENSG00000184613	NELL2	0.500333	0.000110373
ENSG00000047249	ATP6V1H	0.500446	0.000114274
ENSG00000165349	SLC7A3	0.500736	0.00012613
ENSG00000170275	CRTAP	0.50089	8.54986e-05
ENSG00000149054	ZNF215	0.501006	5.0012e-05
ENSG00000186732	MPPED1	0.501026	5.91513e-05
ENSG00000184845	DRD1	0.501119	6.33142e-05
ENSG00000113327	GABRG2	0.501187	6.86922e-05
ENSG00000121905	HPCA	0.501203	8.15895e-05
ENSG00000173598	NUDT4	0.501459	0.000159809
ENSG00000130368	MAS1	0.501518	9.4585e-05
ENSG00000260711	AL121839.2	0.50153	6.81596e-05
ENSG00000172031	EPHX4	0.50158	7.80727e-05
ENSG00000173114	LRRN3	0.501584	0.000150491
ENSG00000184156	KCNQ3	0.501735	6.40446e-05
ENSG00000081138	CDH7	0.50175	0.000109873
ENSG00000172602	RND1	0.501865	4.02352e-05
ENSG00000083896	YTHDC1	0.501956	4.29067e-05
ENSG00000179542	SLITRK4	0.501958	0.000102758
ENSG00000072201	LNX1	0.502062	0.000136238
ENSG00000135482	ZC3H10	0.502111	8.99983e-05
ENSG00000135925	WNT10A	0.50231	7.56928e-05
ENSG00000034239	EFCAB1	0.502322	3.58553e-05
ENSG00000250305	TRMT9B	0.502505	4.95558e-05
ENSG00000166206	GABRB3	0.502549	7.86047e-05
ENSG00000116251	RPL22	0.502574	8.18367e-05
ENSG00000166257	SCN3B	0.502639	0.000134992
ENSG00000144290	SLC4A10	0.502819	0.000107494
ENSG00000152932	RAB3C	0.50307	0.000131658
ENSG00000164129	NPY5R	0.503084	7.7237e-05
ENSG00000175906	ARL4D	0.503096	0.000210893
ENSG00000118160	SLC8A2	0.503337	9.34478e-05
ENSG00000172247	C1QTNF4	0.503412	8.18367e-05
ENSG00000129596	CDO1	0.503546	0.000101364
ENSG00000155158	TTC39B	0.503597	3.88796e-05
ENSG00000188011	RTP5	0.503604	1.88762e-05
ENSG00000041353	RAB27B	0.503675	0.000129001
ENSG00000184388	PABPC1L2B	0.504073	4.8483e-05
ENSG00000165282	PIGO	0.50411	2.09884e-05
ENSG00000135454	B4GALNT1	0.504171	7.80535e-05
ENSG00000146147	MLIP	0.504471	0.000108733
ENSG00000180044	C3orf80	0.504759	0.000142436
ENSG00000214694	ARHGEF33	0.504957	6.20577e-05
ENSG00000135423	GLS2	0.505265	0.000100327
ENSG00000149927	DOC2A	0.505283	0.000112513
ENSG00000166171	DPCD	0.505332	6.98088e-05
ENSG00000175874	CREG2	0.50534	7.19808e-05
ENSG00000168653	NDUFS5	0.5054	9.08256e-05
ENSG00000144868	TMEM108	0.505415	0.000152856
ENSG00000100628	ASB2	0.505448	7.80727e-05
ENSG00000175606	TMEM70	0.505563	0.00026533
ENSG00000125851	PCSK2	0.505603	0.000124947
ENSG00000123496	IL13RA2	0.505604	0.000123625
ENSG00000101489	CELF4	0.505662	5.69384e-05
ENSG00000235531	MSC-AS1	0.505694	8.83254e-05
ENSG00000169220	RGS14	0.506021	9.20195e-05
ENSG00000122574	WIPF3	0.506058	0.000205975
ENSG00000139211	AMIGO2	0.506155	4.8483e-05
ENSG00000170540	ARL6IP1	0.506222	0.000189811
ENSG00000050628	PTGER3	0.506383	0.00017018
ENSG00000143947	RPS27A	0.506398	0.000107494
ENSG00000008083	JARID2	0.506508	8.18127e-05
ENSG00000185737	NRG3	0.506542	0.000101364
ENSG00000235280	MCF2L-AS1	0.506569	6.20577e-05
ENSG00000047936	ROS1	0.506662	0.000179457
ENSG00000225206	MIR137HG	0.506745	5.15887e-05
ENSG00000121104	FAM117A	0.506772	3.84122e-05
ENSG00000170579	DLGAP1	0.506941	0.000112287
ENSG00000174473	GALNTL6	0.507148	8.99983e-05
ENSG00000180660	MAB21L1	0.507246	4.57873e-05
ENSG00000232220	AC008440.2	0.507297	0.000102758
ENSG00000113805	CNTN3	0.507349	0.000145837
ENSG00000111913	RIPOR2	0.507359	0.000102758
ENSG00000132872	SYT4	0.507402	0.000126311
ENSG00000101349	PAK5	0.507491	0.000100914
ENSG00000116329	OPRD1	0.507553	8.73358e-05
ENSG00000117691	NENF	0.507641	0.000182464
ENSG00000127603	MACF1	0.507683	0.000658226
ENSG00000070193	FGF10	0.507905	0.000222974
ENSG00000196465	MYL6B	0.50791	6.3206e-05
ENSG00000100276	RASL10A	0.50799	6.87775e-05
ENSG00000204387	C6orf48	0.508241	0.00016144
ENSG00000186642	PDE2A	0.508248	0.000111956
ENSG00000132563	REEP2	0.508324	5.296e-05
ENSG00000144959	NCEH1	0.508439	5.04798e-05
ENSG00000131626	PPFIA1	0.508463	0.000157434
ENSG00000180440	SERTM1	0.50854	0.000107494
ENSG00000177511	ST8SIA3	0.508584	9.52592e-05
ENSG00000235118	FAM237A	0.508624	8.18367e-05
ENSG00000105649	RAB3A	0.508642	0.00022949
ENSG00000109738	GLRB	0.508664	6.87775e-05
ENSG00000175471	MCTP1	0.508771	0.00021082
ENSG00000160293	VAV2	0.508807	3.56359e-05
ENSG00000144619	CNTN4	0.50881	0.000157434
ENSG00000248485	PCP4L1	0.508932	0.000133419
ENSG00000152556	PFKM	0.509066	0.000114696
ENSG00000130540	SULT4A1	0.509141	6.89062e-05
ENSG00000118194	TNNT2	0.509193	8.57219e-05
ENSG00000108684	ASIC2	0.509284	0.000107494
ENSG00000069424	KCNAB2	0.509352	7.14663e-05
ENSG00000205279	CTXN3	0.509453	6.98088e-05
ENSG00000185386	MAPK11	0.509491	4.65008e-05
ENSG00000259946	BX005019.1	0.50951	0.000114276
ENSG00000134940	ACRV1	0.509553	0.000113633
ENSG00000132749	TESMIN	0.509567	0.000125446
ENSG00000117114	ADGRL2	0.509691	9.6201e-05
ENSG00000172985	SH3RF3	0.509761	6.77691e-05
ENSG00000162975	KCNF1	0.509814	0.000154699
ENSG00000114956	DGUOK	0.509886	0.000392791
ENSG00000072832	CRMP1	0.509967	0.000188022
ENSG00000115419	GLS	0.510276	0.00011484
ENSG00000078328	RBFOX1	0.510304	6.31068e-05
ENSG00000197756	RPL37A	0.510476	0.000110373
ENSG00000100564	PIGH	0.510526	0.000114279
ENSG00000167178	ISLR2	0.510588	9.08308e-05
ENSG00000152954	NRSN1	0.510637	0.000120391
ENSG00000167196	FBXO22	0.510671	4.29998e-05
ENSG00000110675	ELMOD1	0.51076	9.81523e-05
ENSG00000083454	P2RX5	0.510802	0.000123625
ENSG00000183775	KCTD16	0.510846	0.000157434
ENSG00000133816	MICAL2	0.510951	0.00012271
ENSG00000196704	AMZ2	0.511075	9.28546e-05
ENSG00000131015	ULBP2	0.511076	9.99417e-05
ENSG00000078725	BRINP1	0.511099	0.000109992
ENSG00000267272	LINC01140	0.511213	6.84471e-05
ENSG00000140945	CDH13	0.511221	0.000106952
ENSG00000184999	SLC22A10	0.511257	0.000151599
ENSG00000272016	ENSG00000272016	0.511368	0.000106952
ENSG00000204392	LSM2	0.511431	0.000134072
ENSG00000206187	LINC02346	0.51145	0.00012271
ENSG00000104722	NEFM	0.511571	0.000126826
ENSG00000117009	KMO	0.511611	0.000175429
ENSG00000140015	KCNH5	0.511721	0.00018384
ENSG00000078018	MAP2	0.51186	0.000143955
ENSG00000269998	ENSG00000269998	0.511886	0.000114788
ENSG00000163673	DCLK3	0.511897	0.00011484
ENSG00000160145	KALRN	0.511908	0.000115034
ENSG00000169271	HSPB3	0.512063	0.000113634
ENSG00000165819	METTL3	0.512258	0.000113634
ENSG00000182575	NXPH3	0.512355	6.37149e-05
ENSG00000104723	TUSC3	0.512377	0.000188481
ENSG00000170004	CHD3	0.512533	0.000191564
ENSG00000048545	GUCA1A	0.512747	0.000157434
ENSG00000158050	DUSP2	0.512772	5.69384e-05
ENSG00000102466	FGF14	0.512855	0.000156931
ENSG00000160932	LY6E	0.512864	0.000106952
ENSG00000205562	AL049775.1	0.51309	5.92161e-05
ENSG00000123349	PFDN5	0.513122	0.000144119
ENSG00000120685	PROSER1	0.513168	6.20577e-05
ENSG00000138286	FAM149B1	0.513365	0.000133515
ENSG00000143379	SETDB1	0.513376	0.000207395
ENSG00000115598	IL1RL2	0.513396	0.000122036
ENSG00000137825	ITPKA	0.513414	0.000141315
ENSG00000171159	C9orf16	0.51352	4.91472e-05
ENSG00000134317	GRHL1	0.513774	0.000174169
ENSG00000167680	SEMA6B	0.514043	0.000121431
ENSG00000160161	CILP2	0.514149	9.4585e-05
ENSG00000167964	RAB26	0.514189	9.20881e-05
ENSG00000139998	RAB15	0.514219	0.000159155
ENSG00000115760	BIRC6	0.514234	3.87526e-05
ENSG00000203875	SNHG5	0.514256	0.000246442
ENSG00000196482	ESRRG	0.514352	4.8483e-05
ENSG00000255082	GRM5-AS1	0.51436	0.000255229
ENSG00000145349	CAMK2D	0.5144	0.000136602
ENSG00000253537	PCDHGA7	0.514405	8.65827e-05
ENSG00000005249	PRKAR2B	0.514407	8.8784e-05
ENSG00000257069	AP001453.3	0.514509	0.000102283
ENSG00000174775	HRAS	0.514516	7.80535e-05
ENSG00000171992	SYNPO	0.514712	0.000157434
ENSG00000152214	RIT2	0.514758	0.000139331
ENSG00000139182	CLSTN3	0.514784	0.000175674
ENSG00000172292	CERS6	0.514786	0.000191045
ENSG00000136531	SCN2A	0.51497	0.000288565
ENSG00000146386	ABRACL	0.515257	0.000154282
ENSG00000115641	FHL2	0.515279	0.000220432
ENSG00000103145	HCFC1R1	0.515299	0.000118386
ENSG00000168061	SAC3D1	0.515405	0.000373502
ENSG00000280435	AC006058.4	0.515442	9.01259e-05
ENSG00000234394	AL353608.3	0.515448	0.000116585
ENSG00000153823	PID1	0.515494	5.15887e-05
ENSG00000233123	LINC01007	0.515572	8.50792e-05
ENSG00000221946	FXYD7	0.515655	7.61178e-05
ENSG00000127366	TAS2R5	0.515716	0.000144008
ENSG00000176171	BNIP3	0.515763	0.000110697
ENSG00000206052	DOK6	0.515871	6.31068e-05
ENSG00000112290	WASF1	0.516083	0.000202233
ENSG00000104327	CALB1	0.516226	0.000207717
ENSG00000079308	TNS1	0.516372	0.000200678
ENSG00000085831	TTC39A	0.516413	0.000144824
ENSG00000198225	FKBP1C	0.516426	8.18367e-05
ENSG00000120899	PTK2B	0.516803	0.000168675
ENSG00000235961	PNMA6A	0.516862	0.000612802
ENSG00000128250	RFPL1	0.516951	9.20881e-05
ENSG00000077327	SPAG6	0.517106	6.65688e-05
ENSG00000168993	CPLX1	0.517121	0.000114274
ENSG00000180616	SSTR2	0.517222	0.000131202
ENSG00000090971	NAT14	0.517264	4.8483e-05
ENSG00000135549	PKIB	0.517364	0.000116226
ENSG00000168350	DEGS2	0.517638	0.000146529
ENSG00000079819	EPB41L2	0.517674	4.92724e-05
ENSG00000198763	MT-ND2	0.517707	0.000437377
ENSG00000014641	MDH1	0.517717	0.00061377
ENSG00000151789	ZNF385D	0.517822	9.81523e-05
ENSG00000052841	TTC17	0.518032	0.000132964
ENSG00000153233	PTPRR	0.518119	0.000206256
ENSG00000121440	PDZRN3	0.518242	0.000177006
ENSG00000242173	ARHGDIG	0.518274	9.11948e-05
ENSG00000166619	BLCAP	0.518424	6.9345e-05
ENSG00000107242	PIP5K1B	0.518429	0.00012271
ENSG00000175416	CLTB	0.518783	5.51661e-05
ENSG00000188785	ZNF548	0.51879	0.000143231
ENSG00000186300	ZNF555	0.518828	9.38396e-05
ENSG00000184347	SLIT3	0.518899	0.000167023
ENSG00000265179	AP000894.2	0.518928	0.000171749
ENSG00000125848	FLRT3	0.519109	0.000354769
ENSG00000125675	GRIA3	0.519169	0.000169662
ENSG00000149932	TMEM219	0.519172	0.000167023
ENSG00000124785	NRN1	0.519302	0.000456457
ENSG00000270689	BUD13P1	0.51959	0.000121005
ENSG00000105705	SUGP1	0.519687	0.000100914
ENSG00000235865	GSN-AS1	0.519938	5.0012e-05
ENSG00000183011	NAA38	0.519951	0.000167023
ENSG00000100285	NEFH	0.519994	0.000536318
ENSG00000145242	EPHA5	0.520109	0.000405039
ENSG00000258283	AC011603.3	0.520142	0.000173001
ENSG00000153563	CD8A	0.520238	0.000333737
ENSG00000145526	CDH18	0.520297	0.000180836
ENSG00000162687	KCNT2	0.520418	0.000437377
ENSG00000124194	GDAP1L1	0.520537	0.000231171
ENSG00000108523	RNF167	0.520572	6.27497e-05
ENSG00000137563	GGH	0.520624	0.000300692
ENSG00000266472	MRPS21	0.52063	0.000113633
ENSG00000102172	SMS	0.520852	0.000208692
ENSG00000091482	SMPX	0.520862	0.000156203
ENSG00000255087	AP001993.1	0.520879	0.000154129
ENSG00000136099	PCDH8	0.521006	0.000175307
ENSG00000159899	NPR2	0.521097	6.65688e-05
ENSG00000198673	FAM19A2	0.521159	0.000208733
ENSG00000072657	TRHDE	0.521172	0.000241216
ENSG00000122254	HS3ST2	0.521183	0.00012613
ENSG00000269210	AC019171.1	0.521212	0.000199525
ENSG00000158856	DMTN	0.521231	0.000397223
ENSG00000232040	ZBED9	0.521314	0.000199675
ENSG00000150361	KLHL1	0.521465	0.000161057
ENSG00000145934	TENM2	0.521484	0.000200589
ENSG00000196542	SPTSSB	0.521487	0.00023906
ENSG00000156411	ATP5MPL	0.521882	4.63246e-05
ENSG00000048740	CELF2	0.522035	0.000188574
ENSG00000250584	LINC01511	0.52209	0.000206495
ENSG00000101746	NOL4	0.522115	9.64814e-05
ENSG00000116793	PHTF1	0.522191	0.000114279
ENSG00000261193	AC134312.4	0.522253	0.000154699
ENSG00000159247	TUBBP5	0.522394	0.000208535
ENSG00000138378	STAT4	0.522516	0.000180836
ENSG00000130590	SAMD10	0.522662	8.39393e-05
ENSG00000196507	TCEAL3	0.522685	0.000221397
ENSG00000071889	FAM3A	0.522797	0.000693194
ENSG00000138606	SHF	0.522802	7.56976e-05
ENSG00000259327	AC023906.3	0.522919	0.000269645
ENSG00000175806	MSRA	0.523122	0.000115474
ENSG00000105254	TBCB	0.523179	0.00347692
ENSG00000173406	DAB1	0.52318	7.36949e-05
ENSG00000143590	EFNA3	0.523227	0.000220632
ENSG00000227372	TP73-AS1	0.52348	0.000272957
ENSG00000184281	TSSC4	0.523566	0.000526044
ENSG00000144407	PTH2R	0.523578	0.000174169
ENSG00000124507	PACSIN1	0.523732	0.000169662
ENSG00000119946	CNNM1	0.523754	0.000205166
ENSG00000126749	EMG1	0.523795	0.000435874
ENSG00000189241	TSPYL1	0.523854	0.000168538
ENSG00000253972	MAL2-AS1	0.523931	0.000191045
ENSG00000134986	NREP	0.52394	6.41976e-05
ENSG00000105642	KCNN1	0.524005	0.000241299
ENSG00000254585	MAGEL2	0.524012	0.000290898
ENSG00000007516	BAIAP3	0.524047	0.000275588
ENSG00000040608	RTN4R	0.524103	0.000235994
ENSG00000088832	FKBP1A	0.524336	7.65654e-05
ENSG00000137494	ANKRD42	0.524423	0.000175043
ENSG00000177098	SCN4B	0.524455	0.00023906
ENSG00000163932	PRKCD	0.524465	0.000279015
ENSG00000164951	PDP1	0.524472	0.000233966
ENSG00000143256	PFDN2	0.524549	0.000279505
ENSG00000172782	FADS6	0.524557	0.000239595
ENSG00000136856	SLC2A8	0.524558	0.000262831
ENSG00000136935	GOLGA1	0.524567	0.000165317
ENSG00000164100	NDST3	0.524712	0.000322752
ENSG00000106648	GALNTL5	0.524719	0.000209441
ENSG00000119042	SATB2	0.524769	0.00024385
ENSG00000227825	SLC9A7P1	0.524778	0.000244212
ENSG00000111344	RASAL1	0.524833	9.99417e-05
ENSG00000108018	SORCS1	0.524934	0.000222974
ENSG00000197969	VPS13A	0.525037	0.000497961
ENSG00000172794	RAB37	0.525222	8.73358e-05
ENSG00000178015	GPR150	0.525332	0.000331721
ENSG00000124134	KCNS1	0.525386	0.000180836
ENSG00000186487	MYT1L	0.525412	0.000361488
ENSG00000183479	TREX2	0.525472	0.000251559
ENSG00000186288	PABPC1L2A	0.525582	0.00024385
ENSG00000204789	ZNF204P	0.525647	0.000279505
ENSG00000154099	DNAAF1	0.525775	8.18367e-05
ENSG00000226490	AC138647.1	0.525884	0.000174169
ENSG00000054356	PTPRN	0.525985	0.000215618
ENSG00000162494	LRRC38	0.525986	0.000291251
ENSG00000278897	AC020951.1	0.526144	0.00022949
ENSG00000273604	EPOP	0.526147	0.00037287
ENSG00000276991	RF01877	0.526161	0.000175043
ENSG00000168090	COPS6	0.526182	0.000657284
ENSG00000107130	NCS1	0.526197	0.000279703
ENSG00000110427	KIAA1549L	0.526262	0.000245625
ENSG00000165061	ZMAT4	0.52635	0.00023955
ENSG00000130005	GAMT	0.526368	0.000419897
ENSG00000155974	GRIP1	0.526428	0.000246442
ENSG00000170786	SDR16C5	0.526443	0.000208692
ENSG00000161681	SHANK1	0.526486	0.000311541
ENSG00000224032	EPB41L4A-AS1	0.526683	0.00066998
ENSG00000131831	RAI2	0.526746	0.000207154
ENSG00000176454	LPCAT4	0.526767	0.000275588
ENSG00000225663	MCRIP1	0.526786	0.000238829
ENSG00000159753	CARMIL2	0.52697	0.000222974
ENSG00000157782	CABP1	0.527003	0.0106818
ENSG00000139874	SSTR1	0.527035	0.00039478
ENSG00000197937	ZNF347	0.527038	0.000107494
ENSG00000123360	PDE1B	0.527189	0.00039543
ENSG00000178394	HTR1A	0.527311	0.000340615
ENSG00000130177	CDC16	0.527321	0.000238565
ENSG00000005486	RHBDD2	0.527355	8.76233e-05
ENSG00000185551	NR2F2	0.527504	0.00044505
ENSG00000204677	FAM153C	0.527544	0.000168421
ENSG00000183090	FREM3	0.527602	0.000133419
ENSG00000143502	SUSD4	0.527602	0.000331564
ENSG00000052126	PLEKHA5	0.527654	0.000220632
ENSG00000008256	CYTH3	0.527686	0.000210893
ENSG00000270069	MIR222HG	0.527695	0.000156203
ENSG00000111262	KCNA1	0.527702	0.000334232
ENSG00000143164	DCAF6	0.527734	0.000448447
ENSG00000119698	PPP4R4	0.527748	0.000441581
ENSG00000166105	GLB1L3	0.527829	0.000189811
ENSG00000197705	KLHL14	0.527915	0.000437377
ENSG00000143867	OSR1	0.52792	0.000208038
ENSG00000168348	INSM2	0.52804	0.000322981
ENSG00000185989	RASA3	0.528146	0.000457048
ENSG00000053438	NNAT	0.528282	0.000161364
ENSG00000247853	AC006064.2	0.528381	0.000159765
ENSG00000198585	NUDT16	0.528511	0.000246442
ENSG00000179915	NRXN1	0.528524	0.000328639
ENSG00000006210	CX3CL1	0.528582	0.000275588
ENSG00000105784	RUNDC3B	0.528609	0.000368985
ENSG00000139973	SYT16	0.528701	0.000354317
ENSG00000140743	CDR2	0.528734	0.000609531
ENSG00000116106	EPHA4	0.528738	0.000354769
ENSG00000049130	KITLG	0.528749	0.000415002
ENSG00000197457	STMN3	0.528787	0.000255208
ENSG00000103034	NDRG4	0.528853	0.000399149
ENSG00000165899	OTOGL	0.528906	0.000637782
ENSG00000128487	SPECC1	0.528944	0.00023906
ENSG00000102104	RS1	0.529034	0.000277009
ENSG00000233932	CTXN2	0.529083	0.000351465
ENSG00000253846	PCDHGA10	0.529312	0.000243127
ENSG00000184470	TXNRD2	0.529333	0.00024174
ENSG00000168830	HTR1E	0.529353	0.000136238
ENSG00000279138	AP002847.1	0.52938	0.000333737
ENSG00000260837	ENSG00000260837	0.529435	0.000333333
ENSG00000206432	TMEM200C	0.52947	0.000119833
ENSG00000118307	CASC1	0.529535	0.0111447
ENSG00000077279	DCX	0.529621	0.000376506
ENSG00000138675	FGF5	0.529754	0.000168675
ENSG00000035141	FAM136A	0.529755	0.000235068
ENSG00000139714	MORN3	0.529785	0.000376447
ENSG00000156976	EIF4A2	0.529808	0.000203127
ENSG00000160345	C9orf116	0.529841	9.34478e-05
ENSG00000154478	GPR26	0.529897	0.000234117
ENSG00000148308	GTF3C5	0.529922	0.000427009
ENSG00000174453	VWC2L	0.530143	0.000269555
ENSG00000153253	SCN3A	0.530245	0.000220052
ENSG00000198689	SLC9A6	0.530294	0.000595421
ENSG00000198435	NRARP	0.530366	7.69524e-05
ENSG00000164440	TXLNB	0.530433	0.000389437
ENSG00000120820	GLT8D2	0.53051	0.000247859
ENSG00000140939	NOL3	0.530548	0.00039543
ENSG00000143156	NME7	0.530591	0.000289715
ENSG00000168032	ENTPD3	0.530685	0.000287424
ENSG00000165752	STK32C	0.53072	0.000220958
ENSG00000267909	CCDC177	0.530862	0.000312006
ENSG00000166922	SCG5	0.531102	0.000464885
ENSG00000137766	UNC13C	0.531108	0.000334161
ENSG00000106263	EIF3B	0.531285	0.000819973
ENSG00000136938	ANP32B	0.5314	0.000248761
ENSG00000151952	TMEM132D	0.531401	0.000481485
ENSG00000079841	RIMS1	0.531409	0.00032098
ENSG00000177238	TRIM72	0.531563	9.59008e-05
ENSG00000096092	TMEM14A	0.531592	0.000553013
ENSG00000162105	SHANK2	0.531594	0.000219574
ENSG00000163166	IWS1	0.531669	0.000239595
ENSG00000154027	AK5	0.531806	0.000391578
ENSG00000204044	SLC12A5-AS1	0.531814	0.000230957
ENSG00000105880	DLX5	0.531914	0.000255208
ENSG00000104969	SGTA	0.532019	0.000631794
ENSG00000259234	ANKRD34C-AS1	0.532066	0.00066646
ENSG00000137824	RMDN3	0.532077	0.000167023
ENSG00000082014	SMARCD3	0.532111	0.000114279
ENSG00000186891	TNFRSF18	0.532123	0.000235994
ENSG00000112149	CD83	0.532162	0.000389073
ENSG00000136950	ARPC5L	0.532244	0.000273912
ENSG00000100167	SEPT3	0.532284	0.00057508
ENSG00000164610	RP9	0.532378	0.000463472
ENSG00000128573	FOXP2	0.532623	0.000749047
ENSG00000141580	WDR45B	0.532627	0.000263608
ENSG00000235426	AL133481.1	0.532631	0.000456502
ENSG00000132359	RAP1GAP2	0.53264	0.000310925
ENSG00000134121	CHL1	0.532649	0.000638842
ENSG00000135953	MFSD9	0.532718	9.74412e-05
ENSG00000171243	SOSTDC1	0.532793	0.000322752
ENSG00000184014	DENND5A	0.532821	0.000356209
ENSG00000100142	POLR2F	0.532845	0.000359481
ENSG00000072110	ACTN1	0.532867	0.000231261
ENSG00000147246	HTR2C	0.532947	0.000249481
ENSG00000101958	GLRA2	0.532952	0.000653479
ENSG00000138028	CGREF1	0.532954	0.000434179
ENSG00000139970	RTN1	0.532998	0.000340398
ENSG00000123901	GPR83	0.533081	0.000245642
ENSG00000162981	FAM84A	0.533088	0.000277009
ENSG00000163793	DNAJC5G	0.533193	0.000209441
ENSG00000178127	NDUFV2	0.533271	0.000631794
ENSG00000236922	LINC01378	0.533274	0.00029336
ENSG00000224116	INHBA-AS1	0.533277	0.000375338
ENSG00000272909	AL122035.2	0.533293	0.000365178
ENSG00000228594	FNDC10	0.533358	0.000220632
ENSG00000156463	SH3RF2	0.53346	0.000320425
ENSG00000091622	PITPNM3	0.533496	0.000351465
ENSG00000112981	NME5	0.533564	0.000440032
ENSG00000157106	SMG1	0.533653	9.23773e-05
ENSG00000132275	RRP8	0.533741	0.000372953
ENSG00000178821	TMEM52	0.533764	0.000262831
ENSG00000138814	PPP3CA	0.533902	0.000275588
ENSG00000181908	AP003774.1	0.533911	0.000255208
ENSG00000150556	LYPD6B	0.533967	0.000371581
ENSG00000137843	PAK6	0.534008	0.000217186
ENSG00000182768	NGRN	0.534052	0.000762745
ENSG00000213047	DENND1B	0.534072	0.000376978
ENSG00000136141	LRCH1	0.534085	0.000157434
ENSG00000112232	KHDRBS2	0.534142	0.000182464
ENSG00000152969	JAKMIP1	0.534153	0.000771338
ENSG00000135324	MRAP2	0.534153	0.000370811
ENSG00000144355	DLX1	0.53419	0.000207845
ENSG00000225110	PNMA6F	0.534203	0.000456457
ENSG00000081803	CADPS2	0.534231	0.000185534
ENSG00000177479	ARIH2	0.534318	0.00061377
ENSG00000157870	FAM213B	0.534338	0.000606154
ENSG00000123191	ATP7B	0.534399	0.000129389
ENSG00000272420	AL513477.2	0.534435	9.41114e-05
ENSG00000145491	ROPN1L	0.534465	0.000309988
ENSG00000157542	KCNJ6	0.534626	0.000343159
ENSG00000183785	TUBA8	0.53464	0.000428401
ENSG00000205037	AC134312.1	0.534668	0.000462557
ENSG00000264443	AL445686.2	0.534679	0.000195538
ENSG00000231233	CFAP58-AS1	0.534702	0.00060558
ENSG00000145147	SLIT2	0.534724	0.000413402
ENSG00000198216	CACNA1E	0.534768	0.000350188
ENSG00000248455	LINC02217	0.534774	0.000346666
ENSG00000215217	C5orf49	0.53479	0.000174169
ENSG00000221866	PLXNA4	0.534849	0.000370811
ENSG00000007520	TSR3	0.53498	0.000573711
ENSG00000234390	USP27X-AS1	0.535075	0.000399505
ENSG00000136052	SLC41A2	0.53536	0.000497223
ENSG00000100941	PNN	0.53538	0.000334885
ENSG00000132763	MMACHC	0.535404	0.000190893
ENSG00000164465	DCBLD1	0.535498	0.00113162
ENSG00000187122	SLIT1	0.535521	0.000413402
ENSG00000272379	AL008729.2	0.535549	0.000344309
ENSG00000111218	PRMT8	0.535572	0.000381668
ENSG00000161677	JOSD2	0.535627	0.00104109
ENSG00000171943	SRGAP2C	0.535642	0.00026368
ENSG00000177556	ATOX1	0.535675	0.000671796
ENSG00000171246	NPTX1	0.53573	0.000439356
ENSG00000197343	ZNF655	0.535735	0.000166615
ENSG00000187186	AL162231.1	0.535804	0.000156203
ENSG00000182621	PLCB1	0.53581	0.000607628
ENSG00000101977	MCF2	0.535811	0.000610679
ENSG00000166979	EVA1C	0.535965	0.000455493
ENSG00000269145	AC007192.2	0.536025	0.000173001
ENSG00000006432	MAP3K9	0.536045	0.000407206
ENSG00000114812	VIPR1	0.536091	0.000358072
ENSG00000174460	ZCCHC12	0.536095	0.000449445
ENSG00000101412	E2F1	0.536332	0.000129389
ENSG00000133135	RNF128	0.536368	0.000217186
ENSG00000165424	ZCCHC24	0.536441	0.000389728
ENSG00000148120	C9orf3	0.536613	0.000660372
ENSG00000178752	ERFE	0.536917	0.000346666
ENSG00000221890	NPTXR	0.536947	0.000463472
ENSG00000176840	MIR7-3HG	0.536948	0.000490866
ENSG00000188916	FAM196A	0.537003	0.000249444
ENSG00000124702	KLHDC3	0.537056	0.000245037
ENSG00000163536	SERPINI1	0.537292	0.000269645
ENSG00000260230	FRRS1L	0.537296	0.00154758
ENSG00000125775	SDCBP2	0.537347	0.000266068
ENSG00000185274	GALNT17	0.537622	0.000406656
ENSG00000186577	SMIM29	0.537741	0.000286159
ENSG00000269945	AC004817.4	0.537831	0.000385922
ENSG00000130511	SSBP4	0.537891	0.000244196
ENSG00000182512	GLRX5	0.537972	0.000698052
ENSG00000111305	GSG1	0.538067	0.000406656
ENSG00000137571	SLCO5A1	0.538181	0.000329118
ENSG00000102109	PCSK1N	0.538205	0.00026477
ENSG00000128563	PRKRIP1	0.538252	0.000532779
ENSG00000263809	AC135178.2	0.538261	0.000161364
ENSG00000058404	CAMK2B	0.53827	0.000406218
ENSG00000058091	CDK14	0.53827	0.000664408
ENSG00000187772	LIN28B	0.538478	0.000215009
ENSG00000108947	EFNB3	0.53854	0.000481485
ENSG00000116205	TCEANC2	0.538543	0.00038142
ENSG00000197381	ADARB1	0.538632	0.000235994
ENSG00000132386	SERPINF1	0.538658	0.000445444
ENSG00000204271	SPIN3	0.538668	0.000210913
ENSG00000125850	OVOL2	0.538677	0.000351465
ENSG00000175985	PLEKHD1	0.538781	0.000206042
ENSG00000120049	KCNIP2	0.538864	0.000406656
ENSG00000183978	COA3	0.538865	0.000607628
ENSG00000061918	GUCY1B1	0.538932	0.000610679
ENSG00000107262	BAG1	0.538938	0.000559434
ENSG00000169116	PARM1	0.538955	0.000618826
ENSG00000040731	CDH10	0.539188	0.000558252
ENSG00000158089	GALNT14	0.539282	0.00046837
ENSG00000260432	ENSG00000260432	0.539313	0.000551028
ENSG00000184831	APOO	0.539326	0.000625758
ENSG00000236859	NIFK-AS1	0.539356	0.000487042
ENSG00000119632	IFI27L2	0.539361	0.000180836
ENSG00000101460	MAP1LC3A	0.539377	0.0012585
ENSG00000147234	FRMPD3	0.539472	0.000198236
ENSG00000183248	PRR36	0.539567	0.000483268
ENSG00000204356	NELFE	0.53963	0.000558252
ENSG00000231632	ENSG00000231632	0.539684	0.000881623
ENSG00000156687	UNC5D	0.539735	0.000539107
ENSG00000196932	TMEM26	0.539744	0.000174169
ENSG00000267665	AC021683.3	0.539753	0.000262831
ENSG00000165194	PCDH19	0.539805	0.000570207
ENSG00000152092	ASTN1	0.539964	0.00027715
ENSG00000144645	OSBPL10	0.540014	0.000500053
ENSG00000180875	GREM2	0.54003	0.000409409
ENSG00000162873	KLHDC8A	0.540163	0.000215618
ENSG00000172465	TCEAL1	0.540244	0.000775502
ENSG00000134443	GRP	0.54031	0.000333333
ENSG00000181085	MAPK15	0.540325	0.00013129
ENSG00000153820	SPHKAP	0.54036	0.000180836
ENSG00000176101	SSNA1	0.540399	0.000538758
ENSG00000250510	GPR162	0.540399	0.000349613
ENSG00000152520	PAN3	0.54048	0.000348974
ENSG00000129159	KCNC1	0.540523	0.000437377
ENSG00000279013	AC110774.1	0.540531	0.00055133
ENSG00000172346	CSDC2	0.540564	0.000215618
ENSG00000147465	STAR	0.540571	0.00040005
ENSG00000183023	SLC8A1	0.54061	0.000699811
ENSG00000204442	FAM155A	0.540661	0.000605938
ENSG00000279663	AC104623.2	0.540693	0.000365178
ENSG00000169764	UGP2	0.540729	0.00212793
ENSG00000205208	C4orf46	0.540754	0.00039543
ENSG00000050165	DKK3	0.540786	0.00104996
ENSG00000120088	CRHR1	0.540876	0.000355
ENSG00000267673	FDX2	0.540909	0.000199459
ENSG00000072133	RPS6KA6	0.540921	0.000614615
ENSG00000179603	GRM8	0.541086	0.000599635
ENSG00000196549	MME	0.541346	0.000284578
ENSG00000227617	CERS6-AS1	0.541347	0.000515312
ENSG00000010626	LRRC23	0.541348	0.000582724
ENSG00000182809	CRIP2	0.541379	0.000272362
ENSG00000145063	AC062028.1	0.541463	0.000345907
ENSG00000174744	BRMS1	0.541489	0.000441581
ENSG00000131408	NR1H2	0.541496	0.000303006
ENSG00000162188	GNG3	0.541499	0.00057429
ENSG00000100387	RBX1	0.541574	0.000372644
ENSG00000245937	LINC01184	0.541616	0.000449168
ENSG00000215196	BASP1-AS1	0.541708	0.000463472
ENSG00000269987	AC004542.2	0.541754	0.000268614
ENSG00000119508	NR4A3	0.541782	0.000287424
ENSG00000065923	SLC9A7	0.541837	0.000568812
ENSG00000125931	CITED1	0.541842	0.000419475
ENSG00000169933	FRMPD4	0.542069	0.000639813
ENSG00000165802	NSMF	0.542093	0.000498116
ENSG00000170584	NUDCD2	0.542189	0.000652074
ENSG00000101098	RIMS4	0.542224	0.000449168
ENSG00000185933	CALHM1	0.542227	0.000511591
ENSG00000280234	AC124303.2	0.542238	0.000396124
ENSG00000177600	RPLP2	0.542255	0.00091144
ENSG00000106617	PRKAG2	0.542269	0.000614615
ENSG00000214376	VSTM5	0.542281	0.000500376
ENSG00000106479	ZNF862	0.542316	0.000367911
ENSG00000161682	FAM171A2	0.542478	0.000610679
ENSG00000169964	TMEM42	0.542482	0.0017691
ENSG00000266820	KPNA2P3	0.542493	0.000365178
ENSG00000114853	ZBTB47	0.542516	0.000747615
ENSG00000270181	BIVM-ERCC5	0.542523	0.000861386
ENSG00000154162	CDH12	0.542534	0.00060558
ENSG00000265784	AC006441.3	0.542604	0.000286159
ENSG00000213424	KRT222	0.542617	0.000455923
ENSG00000106341	PPP1R17	0.542622	0.000766597
ENSG00000141505	ASGR1	0.542637	0.000385832
ENSG00000086289	EPDR1	0.542643	0.00151065
ENSG00000152580	IGSF10	0.542681	0.000454563
ENSG00000144550	CPNE9	0.542821	0.000570207
ENSG00000272944	AC079834.2	0.542999	0.000449168
ENSG00000103363	ELOB	0.543027	0.000409409
ENSG00000196110	ZNF699	0.543037	0.000557642
ENSG00000163888	CAMK2N2	0.543057	0.000417563
ENSG00000064995	TAF11	0.5431	0.000354596
ENSG00000171951	SCG2	0.543148	0.00111018
ENSG00000133250	ZNF414	0.543213	0.000716655
ENSG00000220575	HTR5A-AS1	0.543263	0.000481153
ENSG00000229891	LINC01315	0.54336	0.000219574
ENSG00000125354	SEPT6	0.543462	0.000379085
ENSG00000149806	FAU	0.543518	0.000610679
ENSG00000247137	AP000873.2	0.54355	0.000171749
ENSG00000217236	SP9	0.543613	0.000577931
ENSG00000114446	IFT57	0.543762	0.000565361
ENSG00000108309	RUNDC3A	0.543799	0.000825534
ENSG00000196277	GRM7	0.54381	0.000377175
ENSG00000214796	AC098934.1	0.54383	0.00122422
ENSG00000139767	SRRM4	0.543854	0.000456457
ENSG00000143499	SMYD2	0.543859	0.0007519
ENSG00000184307	ZDHHC23	0.543916	0.0028539
ENSG00000108604	SMARCD2	0.543923	0.000713585
ENSG00000114279	FGF12	0.543933	0.00105897
ENSG00000162636	FAM102B	0.543986	0.00134975
ENSG00000166250	CLMP	0.544011	0.000239595
ENSG00000173452	TMEM196	0.544075	0.000645771
ENSG00000185008	ROBO2	0.544178	0.000338401
ENSG00000244040	IL12A-AS1	0.544185	0.000573711
ENSG00000065325	GLP2R	0.544189	0.000590066
ENSG00000164096	C4orf3	0.544271	0.00039478
ENSG00000240694	PNMA2	0.54429	0.000522944
ENSG00000198934	MAGEE1	0.544325	0.000334337
ENSG00000145506	NKD2	0.54438	0.000664408
ENSG00000110975	SYT10	0.544416	0.00272082
ENSG00000106683	LIMK1	0.5445	0.000801962
ENSG00000135002	RFK	0.54457	0.000887501
ENSG00000115353	TACR1	0.544607	0.000586154
ENSG00000180638	SLC47A2	0.544643	0.000388757
ENSG00000147408	CSGALNACT1	0.544658	0.000515312
ENSG00000070882	OSBPL3	0.544708	0.000456502
ENSG00000151882	CCL28	0.544945	0.000612315
ENSG00000174915	PTDSS2	0.544967	0.000792454
ENSG00000277692	AL121583.1	0.545091	0.0006652
ENSG00000198840	MT-ND3	0.545163	0.000806143
ENSG00000159592	GPBP1L1	0.545166	0.000614772
ENSG00000144713	RPL32	0.545191	0.000640173
ENSG00000152669	CCNO	0.545209	0.000532779
ENSG00000073969	NSF	0.545239	0.000729383
ENSG00000172943	PHF8	0.545358	0.00031148
ENSG00000167733	HSD11B1L	0.545371	0.000333333
ENSG00000162782	TDRD5	0.545379	0.000879777
ENSG00000226645	AP006216.1	0.545422	0.000943454
ENSG00000164935	DCSTAMP	0.54548	0.000343652
ENSG00000118276	B4GALT6	0.545482	0.000470622
ENSG00000167863	ATP5PD	0.545634	0.00274498
ENSG00000148218	ALAD	0.545646	0.000662524
ENSG00000267396	AC090236.1	0.545648	0.000570207
ENSG00000044524	EPHA3	0.545777	0.000775502
ENSG00000167257	RNF214	0.545808	0.000687154
ENSG00000055609	KMT2C	0.545824	0.000602127
ENSG00000170085	SIMC1	0.545876	0.000559398
ENSG00000198744	MTCO3P12	0.545886	0.000520381
ENSG00000134490	TMEM241	0.545895	0.00104811
ENSG00000111052	LIN7A	0.546002	0.000631794
ENSG00000179546	HTR1D	0.546057	0.000550247
ENSG00000189410	SH2D5	0.546059	0.000558252
ENSG00000250479	CHCHD10	0.54608	0.00039543
ENSG00000215039	CD27-AS1	0.546093	0.000232241
ENSG00000079462	PAFAH1B3	0.546112	0.000290966
ENSG00000125814	NAPB	0.5462	0.00068334
ENSG00000258504	AL157871.1	0.546212	0.00163857
ENSG00000244161	FLNB-AS1	0.546351	0.000817262
ENSG00000086504	MRPL28	0.546465	0.000650914
ENSG00000130119	GNL3L	0.546485	0.000373103
ENSG00000154065	ANKRD29	0.546594	0.000658226
ENSG00000169032	MAP2K1	0.546646	0.0028196
ENSG00000097007	ABL1	0.546828	0.00055133
ENSG00000184349	EFNA5	0.546893	0.000718003
ENSG00000162734	PEA15	0.546951	0.000161364
ENSG00000268069	AC004466.1	0.547041	0.00109522
ENSG00000197872	FAM49A	0.547066	0.000683049
ENSG00000196189	SEMA4A	0.547161	0.000978549
ENSG00000168843	FSTL5	0.547172	0.000257629
ENSG00000168959	GRM5	0.547172	0.000801962
ENSG00000109079	TNFAIP1	0.547176	0.000232932
ENSG00000254973	AC105219.4	0.547454	0.000687154
ENSG00000151914	DST	0.547498	0.00704811
ENSG00000176406	RIMS2	0.547515	0.000586202
ENSG00000198354	DCAF12L2	0.547534	0.000483268
ENSG00000268230	AC012313.3	0.547571	0.00105066
ENSG00000174197	MGA	0.547592	0.000310925
ENSG00000165914	TTC7B	0.547639	0.000669775
ENSG00000122733	PHF24	0.547678	0.000604673
ENSG00000108176	DNAJC12	0.547691	0.000262025
ENSG00000267163	ENSG00000267163	0.547747	0.000770478
ENSG00000198785	GRIN3A	0.547761	0.000411084
ENSG00000115268	RPS15	0.54781	0.000838315
ENSG00000174839	DENND6A	0.547834	0.000391056
ENSG00000256008	AC125616.1	0.547855	0.000582946
ENSG00000103024	NME3	0.547856	0.000825534
ENSG00000168546	GFRA2	0.547857	0.000680795
ENSG00000146221	TCTE1	0.547915	0.00046895
ENSG00000279553	ENSG00000279553	0.547985	0.000672783
ENSG00000102385	DRP2	0.548027	0.000759346
ENSG00000172671	ZFAND4	0.548068	0.000573711
ENSG00000181378	CFAP65	0.548182	0.000246442
ENSG00000154118	JPH3	0.548198	0.000589061
ENSG00000148291	SURF2	0.548205	0.000952348
ENSG00000240225	ZNF542P	0.548239	0.000242849
ENSG00000063180	CA11	0.548247	0.000771559
ENSG00000124191	TOX2	0.548274	0.000643445
ENSG00000149654	CDH22	0.548279	0.000573482
ENSG00000183444	OR7E38P	0.548348	0.000279505
ENSG00000106992	AK1	0.548411	0.000445444
ENSG00000229325	ACAP2-IT1	0.548469	0.000439356
ENSG00000247317	LY6E-DT	0.548476	0.000396124
ENSG00000181656	GPR88	0.548617	0.000770478
ENSG00000257923	CUX1	0.548737	0.000711939
ENSG00000111361	EIF2B1	0.548888	0.000826054
ENSG00000070961	ATP2B1	0.549088	0.00104944
ENSG00000151025	GPR158	0.549172	0.000856121
ENSG00000132017	DCAF15	0.549211	0.000720913
ENSG00000267506	AC021683.2	0.549216	0.000746335
ENSG00000277531	PNMA8C	0.549234	0.000562713
ENSG00000166407	LMO1	0.549241	0.000640173
ENSG00000160325	CACFD1	0.549316	0.000647996
ENSG00000101464	PIGU	0.549352	0.000995063
ENSG00000081985	IL12RB2	0.549482	0.00212894
ENSG00000262209	PCDHGB3	0.549529	0.00095371
ENSG00000148680	HTR7	0.549551	0.000592422
ENSG00000224043	CCNT2-AS1	0.549572	0.000241571
ENSG00000168795	ZBTB5	0.549657	0.000267145
ENSG00000172575	RASGRP1	0.54974	0.00126644
ENSG00000088833	NSFL1C	0.549767	0.00163857
ENSG00000156113	KCNMA1	0.549779	0.000675896
ENSG00000104361	NIPAL2	0.549784	0.000856649
ENSG00000255114	AP003392.3	0.549812	0.000324604
ENSG00000271892	AC026790.1	0.549857	0.000640173
ENSG00000129933	MAU2	0.549865	0.000754397
ENSG00000135502	SLC26A10	0.549888	0.000312878
ENSG00000189046	ALKBH2	0.549906	0.000645524
ENSG00000156486	KCNS2	0.549906	0.000862484
ENSG00000150403	TMCO3	0.550028	0.0007519
ENSG00000135776	ABCB10	0.550203	0.00040005
ENSG00000164855	TMEM184A	0.550269	0.000658226
ENSG00000162191	UBXN1	0.55045	0.00191329
ENSG00000213023	SYT3	0.55046	0.00166018
ENSG00000133302	SLF1	0.550499	0.000735148
ENSG00000258315	C17orf49	0.55052	0.000565361
ENSG00000262967	AC005921.2	0.550529	0.000650751
ENSG00000236015	AC011290.2	0.550536	0.000483268
ENSG00000118402	ELOVL4	0.550583	0.000726363
ENSG00000115392	FANCL	0.550632	0.000220632
ENSG00000263707	AC005277.1	0.550756	0.000650927
ENSG00000256193	LINC00507	0.550787	0.000657284
ENSG00000185305	ARL15	0.550851	0.00217071
ENSG00000068615	REEP1	0.550862	0.000841125
ENSG00000103942	HOMER2	0.55094	0.000688718
ENSG00000153132	CLGN	0.550975	0.000536318
ENSG00000147655	RSPO2	0.551025	0.000958463
ENSG00000185722	ANKFY1	0.551032	0.00023757
ENSG00000197724	PHF2	0.551057	0.000720913
ENSG00000175602	CCDC85B	0.551112	0.000334161
ENSG00000149929	HIRIP3	0.551142	0.000633789
ENSG00000122359	ANXA11	0.551143	0.000860301
ENSG00000146352	CLVS2	0.551185	0.00109216
ENSG00000075340	ADD2	0.551287	0.000838921
ENSG00000241158	ADAMTS9-AS1	0.551426	0.000887501
ENSG00000258643	BCL2L2-PABPN1	0.551434	0.000660506
ENSG00000126775	ATG14	0.551553	0.000538758
ENSG00000163046	ANKRD30BL	0.551637	0.000717073
ENSG00000272121	AC006058.3	0.551673	0.000921364
ENSG00000267796	LIN37	0.551794	0.000931823
ENSG00000139174	PRICKLE1	0.55181	0.00125745
ENSG00000154556	SORBS2	0.551881	0.000648964
ENSG00000173715	C11orf80	0.5519	0.000483268
ENSG00000090097	PCBP4	0.551919	0.00126937
ENSG00000253873	PCDHGA11	0.552004	0.000480992
ENSG00000171161	ZNF672	0.552105	0.000819973
ENSG00000198797	BRINP2	0.552159	0.000419859
ENSG00000168000	BSCL2	0.552207	0.00130802
ENSG00000040933	INPP4A	0.552239	0.00126904
ENSG00000135441	BLOC1S1	0.552253	0.000548791
ENSG00000185344	ATP6V0A2	0.552316	0.000752558
ENSG00000150394	CDH8	0.552344	0.000652888
ENSG00000105650	PDE4C	0.552448	0.000638842
ENSG00000164885	CDK5	0.552554	0.00129355
ENSG00000271869	AC026979.2	0.552587	0.000290242
ENSG00000122033	MTIF3	0.552751	0.000730878
ENSG00000137267	TUBB2A	0.552767	0.00125465
ENSG00000253629	AP000426.1	0.55278	0.000773389
ENSG00000148935	GAS2	0.552885	0.000310925
ENSG00000134874	DZIP1	0.552935	0.00115622
ENSG00000101327	PDYN	0.552956	0.00125465
ENSG00000115252	PDE1A	0.553016	0.00137024
ENSG00000278195	SSTR3	0.553096	0.000778887
ENSG00000154655	L3MBTL4	0.553242	0.000309988
ENSG00000062282	DGAT2	0.55325	0.000637782
ENSG00000100583	SAMD15	0.553261	0.000750374
ENSG00000171604	CXXC5	0.553334	0.00226134
ENSG00000078668	VDAC3	0.553338	0.00158761
ENSG00000151090	THRB	0.553466	0.000958463
ENSG00000171132	PRKCE	0.55349	0.00163928
ENSG00000169087	HSPBAP1	0.553514	0.00112267
ENSG00000151834	GABRA2	0.553541	0.00122152
ENSG00000197714	ZNF460	0.553581	0.000365178
ENSG00000175175	PPM1E	0.553746	0.00195442
ENSG00000130584	ZBTB46	0.553973	0.000381668
ENSG00000156467	UQCRB	0.553993	0.000640173
ENSG00000155893	PXYLP1	0.554045	0.000732882
ENSG00000157064	NMNAT2	0.554049	0.000838315
ENSG00000171488	LRRC8C	0.554052	0.000425208
ENSG00000166924	NYAP1	0.55415	0.00122045
ENSG00000198712	MT-CO2	0.554163	0.000845772
ENSG00000099624	ATP5F1D	0.554277	0.000785459
ENSG00000130731	METTL26	0.554289	0.000804163
ENSG00000275340	FGD5P1	0.554387	0.000771338
ENSG00000008324	SS18L2	0.554437	0.0012998
ENSG00000134057	CCNB1	0.554445	0.00133229
ENSG00000233427	AL009181.1	0.554613	0.000369412
ENSG00000126950	TMEM35A	0.554875	0.00151292
ENSG00000144893	MED12L	0.554966	0.00531333
ENSG00000078900	TP73	0.55498	0.000716655
ENSG00000091972	CD200	0.554988	0.000637782
ENSG00000180884	ZNF792	0.555024	0.000511119
ENSG00000082482	KCNK2	0.555167	0.00129355
ENSG00000167130	DOLPP1	0.555209	0.000441581
ENSG00000166823	MESP1	0.555224	0.000255172
ENSG00000134107	BHLHE40	0.555324	0.000344418
ENSG00000112530	PACRG	0.555476	0.001708
ENSG00000276408	AC025287.2	0.555517	0.000974293
ENSG00000147647	DPYS	0.555731	0.000766597
ENSG00000161381	PLXDC1	0.555822	0.000660506
ENSG00000197982	C1orf122	0.555861	0.000279505
ENSG00000103121	CMC2	0.555917	0.000849603
ENSG00000168234	TTC39C	0.555931	0.000979842
ENSG00000134775	FHOD3	0.555954	0.000843997
ENSG00000165985	C1QL3	0.555965	0.00143156
ENSG00000006128	TAC1	0.556134	0.000874612
ENSG00000188211	NCR3LG1	0.55614	0.00264614
ENSG00000170390	DCLK2	0.556191	0.000910634
ENSG00000104290	FZD3	0.55623	0.00132168
ENSG00000225465	RFPL1S	0.556286	0.000515312
ENSG00000152413	HOMER1	0.556325	0.00100299
ENSG00000163577	EIF5A2	0.556366	0.000518129
ENSG00000130522	JUND	0.556374	0.000852082
ENSG00000184076	UQCR10	0.556592	0.000913131
ENSG00000275131	AC241952.1	0.556597	0.000917905
ENSG00000009724	MASP2	0.55663	0.000643829
ENSG00000182580	EPHB3	0.556649	0.000301195
ENSG00000174791	RIN1	0.55668	0.000391905
ENSG00000261934	PCDHGA9	0.556695	0.000931823
ENSG00000162621	LRRC53	0.556728	0.000884562
ENSG00000026559	KCNG1	0.556729	0.000577817
ENSG00000188290	HES4	0.556806	0.00065121
ENSG00000218227	AC136632.1	0.556828	0.00057508
ENSG00000280304	AC104260.2	0.556904	0.00121444
ENSG00000240771	ARHGEF25	0.556906	0.00124101
ENSG00000166111	SVOP	0.556907	0.00104909
ENSG00000104369	JPH1	0.556912	0.00091309
ENSG00000197860	SGTB	0.557143	0.00178945
ENSG00000109881	CCDC34	0.557154	0.00314697
ENSG00000109452	INPP4B	0.557265	0.00106124
ENSG00000241570	PAQR9-AS1	0.557311	0.00139435
ENSG00000143013	LMO4	0.557344	0.00121944
ENSG00000243449	C4orf48	0.557347	0.000859107
ENSG00000179295	PTPN11	0.557445	0.000791631
ENSG00000263986	AC087393.2	0.557463	0.00107774
ENSG00000262758	ENSG00000262758	0.557523	0.00135975
ENSG00000167526	RPL13	0.557637	0.00153903
ENSG00000265313	LINC01476	0.55775	0.000669775
ENSG00000176490	DIRAS1	0.557798	0.00108398
ENSG00000171502	COL24A1	0.55782	0.000939005
ENSG00000130770	ATP5IF1	0.557872	0.000687154
ENSG00000066629	EML1	0.557931	0.000381668
ENSG00000166603	MC4R	0.558005	0.00119464
ENSG00000146267	FAXC	0.558075	0.00125855
ENSG00000127824	TUBA4A	0.558106	0.00136162
ENSG00000102103	PQBP1	0.558116	0.00104996
ENSG00000150471	ADGRL3	0.558143	0.00265235
ENSG00000099385	BCL7C	0.558186	0.00219917
ENSG00000173227	SYT12	0.55827	0.000770478
ENSG00000167969	ECI1	0.558272	0.000637782
ENSG00000100379	KCTD17	0.558291	0.000279703
ENSG00000150995	ITPR1	0.558304	0.00140986
ENSG00000109944	JHY	0.558306	0.00103004
ENSG00000203950	RTL8A	0.558332	0.00171305
ENSG00000108298	RPL19	0.558359	0.00143382
ENSG00000260101	AC008074.3	0.55845	0.00118037
ENSG00000146963	LUC7L2	0.558477	0.00126644
ENSG00000125266	EFNB2	0.558548	0.00225626
ENSG00000055118	KCNH2	0.558562	0.000500826
ENSG00000040275	SPDL1	0.558634	0.00112179
ENSG00000116497	S100PBP	0.558705	0.00126948
ENSG00000106615	RHEB	0.5588	0.00121444
ENSG00000175077	RTP1	0.558849	0.00124101
ENSG00000133858	ZFC3H1	0.559056	0.000775502
ENSG00000108021	FAM208B	0.559086	0.00065121
ENSG00000197183	NOL4L	0.559157	0.000652888
ENSG00000169554	ZEB2	0.55922	0.00115756
ENSG00000092068	SLC7A8	0.559279	0.000829686
ENSG00000071859	FAM50A	0.559291	0.00121891
ENSG00000259863	SH3RF3-AS1	0.559294	0.000595421
ENSG00000105767	CADM4	0.559329	0.00867114
ENSG00000260336	ENSG00000260336	0.559381	0.00120637
ENSG00000106789	CORO2A	0.559473	0.000769464
ENSG00000154262	ABCA6	0.55954	0.00127718
ENSG00000070669	ASNS	0.559556	0.00177457
ENSG00000143774	GUK1	0.55966	0.000884218
ENSG00000227082	AC244021.1	0.559676	0.00060558
ENSG00000116983	HPCAL4	0.559784	0.00110774
ENSG00000240253	FAR2P3	0.559834	0.00207239
ENSG00000183092	BEGAIN	0.559908	0.00071625
ENSG00000164172	MOCS2	0.559917	0.000348594
ENSG00000184007	PTP4A2	0.559987	0.00152217
ENSG00000120053	GOT1	0.56005	0.00186874
ENSG00000155761	SPAG17	0.560121	0.0007519
ENSG00000104529	EEF1D	0.56013	0.00127753
ENSG00000168824	NSG1	0.560223	0.00137728
ENSG00000170949	ZNF160	0.560223	0.00117815
ENSG00000128581	IFT22	0.560235	0.00107496
ENSG00000008283	CYB561	0.5603	0.00104811
ENSG00000160973	FOXH1	0.560403	0.000536318
ENSG00000121410	A1BG	0.56053	0.00135048
ENSG00000204186	ZDBF2	0.560611	0.00216407
ENSG00000159352	PSMD4	0.560798	0.000981002
ENSG00000186675	MAGEE2	0.560848	0.00143342
ENSG00000267125	AC012615.3	0.560952	0.000345907
ENSG00000122644	ARL4A	0.560966	0.00196707
ENSG00000133316	WDR74	0.561	0.00146092
ENSG00000100105	PATZ1	0.561004	0.00119671
ENSG00000153558	FBXL2	0.561094	0.00152217
ENSG00000198888	MT-ND1	0.561099	0.000902377
ENSG00000078053	AMPH	0.561113	0.00149065
ENSG00000158292	GPR153	0.561141	0.000773389
ENSG00000066923	STAG3	0.561197	0.00124335
ENSG00000271417	ENSG00000271417	0.561305	0.000852082
ENSG00000131016	AKAP12	0.561313	0.00166018
ENSG00000172889	EGFL7	0.561323	0.000556813
ENSG00000164142	FAM160A1	0.561366	0.000638842
ENSG00000095203	EPB41L4B	0.561459	0.00103004
ENSG00000133142	TCEAL4	0.56147	0.00183116
ENSG00000182165	TP53TG1	0.561533	0.00130886
ENSG00000159259	CHAF1B	0.561576	0.00110253
ENSG00000173327	MAP3K11	0.561807	0.000829686
ENSG00000258702	AL137786.1	0.561814	0.0013343
ENSG00000186854	TRABD2A	0.561898	0.00110659
ENSG00000220804	LINC01881	0.561916	0.000552352
ENSG00000158417	EIF5B	0.561927	0.00101651
ENSG00000272031	ANKRD34A	0.561933	0.00115211
ENSG00000261675	AL022313.4	0.561933	0.0203748
ENSG00000176946	THAP4	0.56199	0.00104996
ENSG00000188906	LRRK2	0.562098	0.00191901
ENSG00000168016	TRANK1	0.562183	0.000954184
ENSG00000173915	ATP5MD	0.562184	0.000449445
ENSG00000254929	AL591684.2	0.562275	0.00132996
ENSG00000097021	ACOT7	0.562284	0.00216869
ENSG00000172350	ABCG4	0.562389	0.0012662
ENSG00000213413	PVRIG	0.562403	0.000419897
ENSG00000141750	STAC2	0.562415	0.000880657
ENSG00000152104	PTPN14	0.562416	0.0016083
ENSG00000104825	NFKBIB	0.562422	0.00269988
ENSG00000115738	ID2	0.562495	0.00176771
ENSG00000100211	CBY1	0.562576	0.0016959
ENSG00000124614	RPS10	0.562587	0.00125465
ENSG00000175115	PACS1	0.562601	0.000399149
ENSG00000128805	ARHGAP22	0.562637	0.0018
ENSG00000133110	POSTN	0.562733	0.00102134
ENSG00000225383	SFTA1P	0.562872	0.000621137
ENSG00000130751	NPAS1	0.562882	0.000771338
ENSG00000215845	TSTD1	0.562885	0.00113523
ENSG00000167468	GPX4	0.562955	0.000657284
ENSG00000110047	EHD1	0.562963	0.000941208
ENSG00000008988	RPS20	0.563051	0.00148651
ENSG00000205323	SARNP	0.563081	0.00180986
ENSG00000152034	MCHR2	0.563105	0.000730878
ENSG00000113749	HRH2	0.56321	0.00153903
ENSG00000147789	ZNF7	0.563215	0.00128558
ENSG00000259758	ENSG00000259758	0.563295	0.000990414
ENSG00000185915	KLHL34	0.563349	0.00154531
ENSG00000198825	INPP5F	0.563352	0.00288446
ENSG00000102078	SLC25A14	0.563364	0.00200371
ENSG00000253485	PCDHGA5	0.563386	0.00126937
ENSG00000186188	FFAR4	0.563443	0.00579998
ENSG00000082126	MPP4	0.563459	0.000400579
ENSG00000125743	SNRPD2	0.563539	0.00207192
ENSG00000051341	POLQ	0.563547	0.00102862
ENSG00000272888	LINC01578	0.563571	0.00149976
ENSG00000169946	ZFPM2	0.563583	0.000513893
ENSG00000241563	CORT	0.563586	0.000699811
ENSG00000005884	ITGA3	0.563598	0.000490691
ENSG00000114383	TUSC2	0.563605	0.000850553
ENSG00000102290	PCDH11X	0.563627	0.0013954
ENSG00000111642	CHD4	0.563669	0.00146059
ENSG00000168763	CNNM3	0.563683	0.000790546
ENSG00000131495	NDUFA2	0.563758	0.00141924
ENSG00000158806	NPM2	0.563786	0.00154295
ENSG00000136854	STXBP1	0.563855	0.00128247
ENSG00000105619	TFPT	0.564052	0.000595421
ENSG00000101331	CCM2L	0.564072	0.000817262
ENSG00000273079	GRIN2B	0.56417	0.00130886
ENSG00000213741	RPS29	0.564211	0.00216618
ENSG00000279573	AC134407.2	0.564242	0.00157226
ENSG00000198899	MT-ATP6	0.564277	0.00121944
ENSG00000140987	ZSCAN32	0.564293	0.000611902
ENSG00000170027	YWHAG	0.564325	0.00148651
ENSG00000160396	HIPK4	0.56439	0.00121944
ENSG00000248592	TMEM110-MUSTN1	0.564447	0.00136635
ENSG00000142408	CACNG8	0.564524	0.00133213
ENSG00000006625	GGCT	0.564555	0.00270414
ENSG00000175581	MRPL48	0.564591	0.00146059
ENSG00000159055	MIS18A	0.564607	0.000866828
ENSG00000135164	DMTF1	0.564634	0.00057429
ENSG00000267007	AC012615.2	0.564658	0.000497961
ENSG00000074706	IPCEF1	0.564662	0.00179549
ENSG00000166704	ZNF606	0.564671	0.00147887
ENSG00000006740	ARHGAP44	0.564679	0.00158834
ENSG00000262049	AC139530.1	0.564686	0.00325063
ENSG00000010244	ZNF207	0.56475	0.000441581
ENSG00000128654	MTX2	0.564922	0.00149065
ENSG00000172232	AZU1	0.564982	0.000416157
ENSG00000197461	PDGFA	0.565	0.00252239
ENSG00000101333	PLCB4	0.565064	0.000716805
ENSG00000253953	PCDHGB4	0.5651	0.00126036
ENSG00000129595	EPB41L4A	0.565258	0.00112882
ENSG00000122779	TRIM24	0.565344	0.0014628
ENSG00000184408	KCND2	0.565386	0.000536318
ENSG00000105357	MYH14	0.56539	0.00564478
ENSG00000134222	PSRC1	0.565521	0.000729922
ENSG00000175426	PCSK1	0.565526	0.001708
ENSG00000215475	SIAH3	0.565549	0.000906936
ENSG00000186710	CFAP73	0.565658	0.00133486
ENSG00000198517	MAFK	0.565756	0.00140636
ENSG00000136942	RPL35	0.565838	0.00152372
ENSG00000068650	ATP11A	0.565861	0.00122526
ENSG00000213760	ATP6V1G2	0.565915	0.00163928
ENSG00000165973	NELL1	0.565963	0.00236836
ENSG00000250686	AL049544.1	0.565974	0.00102517
ENSG00000182196	ARL6IP4	0.566033	0.00241588
ENSG00000108395	TRIM37	0.566063	0.00198559
ENSG00000111696	NT5DC3	0.566092	0.00184307
ENSG00000260878	AC104072.1	0.566148	0.00166132
ENSG00000182389	CACNB4	0.566308	0.00206276
ENSG00000144366	GULP1	0.566389	0.00241588
ENSG00000161016	RPL8	0.56643	0.00176771
ENSG00000203685	STUM	0.56649	0.00432291
ENSG00000108231	LGI1	0.566535	0.00118037
ENSG00000060237	WNK1	0.566597	0.0016083
ENSG00000114573	ATP6V1A	0.566874	0.00269424
ENSG00000165323	FAT3	0.566994	0.00161414
ENSG00000110080	ST3GAL4	0.567023	0.00202118
ENSG00000204052	LRRC73	0.567039	0.00148699
ENSG00000101391	CDK5RAP1	0.567126	0.00132123
ENSG00000175497	DPP10	0.567228	0.00241528
ENSG00000107745	MICU1	0.567237	0.000812862
ENSG00000196990	FAM163B	0.567248	0.00134531
ENSG00000234423	LINC01250	0.567346	0.00146742
ENSG00000134686	PHC2	0.567384	0.00161414
ENSG00000149970	CNKSR2	0.567385	0.000808999
ENSG00000254122	PCDHGB7	0.56741	0.00146052
ENSG00000161980	POLR3K	0.567415	0.000438393
ENSG00000152495	CAMK4	0.567418	0.000744703
ENSG00000116141	MARK1	0.567419	0.00192772
ENSG00000176884	GRIN1	0.567528	0.00103004
ENSG00000267022	AC067968.1	0.567557	0.00148125
ENSG00000170906	NDUFA3	0.567581	0.00136162
ENSG00000273275	AC017083.2	0.567586	0.00119889
ENSG00000144580	CNOT9	0.56761	0.00112897
ENSG00000251369	ZNF550	0.567634	0.000511591
ENSG00000165644	COMTD1	0.567721	0.000636543
ENSG00000064199	SPA17	0.567797	0.0017826
ENSG00000179097	HTR1F	0.567817	0.00146551
ENSG00000119787	ATL2	0.567908	0.00142298
ENSG00000204172	AGAP9	0.567942	0.00126439
ENSG00000276075	AC027682.6	0.567968	0.000687154
ENSG00000268573	AC011815.1	0.568025	0.00063929
ENSG00000260328	AC104024.2	0.568107	0.00130249
ENSG00000175220	ARHGAP1	0.568109	0.00290704
ENSG00000164600	NEUROD6	0.568145	0.00209038
ENSG00000233723	LINC01122	0.568154	0.00152217
ENSG00000152931	PART1	0.568168	0.00171151
ENSG00000257103	LSM14A	0.568179	0.00363322
ENSG00000179796	LRRC3B	0.568383	0.000571148
ENSG00000230417	LINC00595	0.56849	0.00198304
ENSG00000102924	CBLN1	0.568527	0.000786959
ENSG00000105887	MTPN	0.568541	0.00393946
ENSG00000122873	CISD1	0.568543	0.002936
ENSG00000251246	AL691442.1	0.568624	0.00126666
ENSG00000163701	IL17RE	0.568648	0.00103698
ENSG00000277420	AC245407.2	0.568711	0.00137511
ENSG00000186001	LRCH3	0.568733	0.00151895
ENSG00000214253	FIS1	0.568772	0.00127707
ENSG00000198858	R3HDM4	0.568787	0.00121944
ENSG00000198915	RASGEF1A	0.568841	0.0016745
ENSG00000232388	SMIM26	0.568882	0.0105017
ENSG00000260448	LCMT1-AS1	0.568889	0.000571876
ENSG00000257365	FNTB	0.568891	0.00168908
ENSG00000143067	ZNF697	0.568961	0.00216549
ENSG00000248593	DSTNP2	0.568967	0.00127029
ENSG00000117602	RCAN3	0.569102	0.00165026
ENSG00000261496	ENSG00000261496	0.569114	0.00125465
ENSG00000185269	NOTUM	0.569137	0.00104996
ENSG00000151490	PTPRO	0.569174	0.00370754
ENSG00000143878	RHOB	0.569241	0.000704315
ENSG00000105176	URI1	0.56937	0.00119042
ENSG00000028528	SNX1	0.569388	0.0018881
ENSG00000248905	FMN1	0.569397	0.00256256
ENSG00000164122	ASB5	0.56941	0.00117256
ENSG00000082293	COL19A1	0.569435	0.00148125
ENSG00000111249	CUX2	0.569439	0.00131729
ENSG00000099804	CDC34	0.569596	0.000558252
ENSG00000125740	FOSB	0.569612	0.000629575
ENSG00000178974	FBXO34	0.569621	0.00427109
ENSG00000162738	VANGL2	0.569625	0.000759003
ENSG00000236279	CLEC2L	0.569643	0.00146742
ENSG00000214026	MRPL23	0.569683	0.00113419
ENSG00000114391	RPL24	0.569694	0.00163443
ENSG00000168734	PKIG	0.569704	0.00120984
ENSG00000143196	DPT	0.56986	0.000950842
ENSG00000048991	R3HDM1	0.569874	0.00133229
ENSG00000251011	TMEM108-AS1	0.569901	0.00130195
ENSG00000171714	ANO5	0.569945	0.00188941
ENSG00000124772	CPNE5	0.569967	0.00195315
ENSG00000162992	NEUROD1	0.570046	0.000814599
ENSG00000243710	CFAP57	0.570116	0.000792454
ENSG00000143995	MEIS1	0.570131	0.00150238
ENSG00000198963	RORB	0.570284	0.00159044
ENSG00000111832	RWDD1	0.570304	0.00172484
ENSG00000136999	NOV	0.570307	0.00155688
ENSG00000248115	AC023154.1	0.570319	0.00220538
ENSG00000137656	BUD13	0.570375	0.00484778
ENSG00000173404	INSM1	0.570381	0.00105452
ENSG00000143198	MGST3	0.570391	0.000869486
ENSG00000196090	PTPRT	0.570397	0.00193073
ENSG00000132294	EFR3A	0.570442	0.00142696
ENSG00000275004	ZNF280B	0.570442	0.00228926
ENSG00000174307	PHLDA3	0.570446	0.00179609
ENSG00000147804	SLC39A4	0.570506	0.00128299
ENSG00000164048	ZNF589	0.570513	0.00137183
ENSG00000145808	ADAMTS19	0.570552	0.00118958
ENSG00000149926	FAM57B	0.570566	0.000965031
ENSG00000268182	SMIM17	0.570567	0.00149976
ENSG00000248309	MEF2C-AS1	0.570601	0.00151944
ENSG00000196510	ANAPC7	0.570644	0.000840557
ENSG00000183340	JRKL	0.570826	0.000610679
ENSG00000179271	GADD45GIP1	0.570831	0.00130431
ENSG00000009413	REV3L	0.570877	0.00136635
ENSG00000240682	ISY1	0.570916	0.001708
ENSG00000047579	DTNBP1	0.570968	0.000662844
ENSG00000198886	MT-ND4	0.570978	0.00191521
ENSG00000116288	PARK7	0.57102	0.00144407
ENSG00000117713	ARID1A	0.571075	0.000590066
ENSG00000211459	MT-RNR1	0.571104	0.00279849
ENSG00000196683	TOMM7	0.571169	0.00121891
ENSG00000164484	TMEM200A	0.571183	0.00260342
ENSG00000189212	DPY19L2P1	0.571346	0.00105066
ENSG00000179262	RAD23A	0.57135	0.00546952
ENSG00000129993	CBFA2T3	0.571354	0.000638842
ENSG00000137642	SORL1	0.571364	0.00166018
ENSG00000112893	MAN2A1	0.571381	0.000841462
ENSG00000163833	FBXO40	0.571382	0.00157512
ENSG00000159248	GJD2	0.571783	0.00363322
ENSG00000131069	ACSS2	0.571785	0.00194375
ENSG00000048405	ZNF800	0.571803	0.000549094
ENSG00000196950	SLC39A10	0.571853	0.00334403
ENSG00000279159	AC003681.1	0.571865	0.00252239
ENSG00000279500	AC108704.2	0.571934	0.00175935
ENSG00000170889	RPS9	0.571946	0.00208504
ENSG00000170873	MTSS1	0.572129	0.002171
ENSG00000215271	HOMEZ	0.572182	0.00273041
ENSG00000100099	HPS4	0.572199	0.00114174
ENSG00000177614	PGBD5	0.572202	0.00216201
ENSG00000147416	ATP6V1B2	0.572244	0.001875
ENSG00000185774	KCNIP4	0.572272	0.00208145
ENSG00000100473	COCH	0.572358	0.00121452
ENSG00000155846	PPARGC1B	0.572372	0.00133213
ENSG00000175229	GAL3ST3	0.572417	0.00209398
ENSG00000110717	NDUFS8	0.572424	0.00218303
ENSG00000174514	MFSD4A	0.572577	0.00261242
ENSG00000107077	KDM4C	0.572718	0.00139441
ENSG00000144285	SCN1A	0.572742	0.00186199
ENSG00000278730	AC005332.7	0.572758	0.00166132
ENSG00000154548	SRSF12	0.572824	0.00224619
ENSG00000261884	AC040162.1	0.572854	0.00114806
ENSG00000167118	URM1	0.572878	0.0021953
ENSG00000141456	PELP1	0.572951	0.000720913
ENSG00000171224	FAM241B	0.572953	0.00130249
ENSG00000130733	YIPF2	0.573069	0.00196893
ENSG00000106400	ZNHIT1	0.573126	0.00476598
ENSG00000112964	GHR	0.573156	0.000982966
ENSG00000197056	ZMYM1	0.573181	0.000993902
ENSG00000273287	AL008718.2	0.573237	0.00105587
ENSG00000165338	HECTD2	0.573259	0.00275251
ENSG00000182732	RGS6	0.573278	0.00152217
ENSG00000130724	CHMP2A	0.573363	0.00194337
ENSG00000151948	GLT1D1	0.57337	0.00198304
ENSG00000125485	DDX31	0.573391	0.00186055
ENSG00000262304	AC027796.3	0.573461	0.00299182
ENSG00000139899	CBLN3	0.573522	0.00178945
ENSG00000122435	TRMT13	0.573539	0.00301249
ENSG00000065054	SLC9A3R2	0.573545	0.00182416
ENSG00000204856	FAM216A	0.573614	0.00275367
ENSG00000132478	UNK	0.573634	0.00340736
ENSG00000142546	NOSIP	0.57366	0.000664408
ENSG00000120251	GRIA2	0.573684	0.00276469
ENSG00000279332	AC090772.4	0.573693	0.00105066
ENSG00000090534	THPO	0.573694	0.000955646
ENSG00000060688	SNRNP40	0.573821	0.00215891
ENSG00000213585	VDAC1	0.573828	0.00322231
ENSG00000177410	ZFAS1	0.573869	0.00207641
ENSG00000130477	UNC13A	0.57394	0.00191183
ENSG00000255498	AC068385.1	0.57398	0.00251286
ENSG00000082515	MRPL22	0.574057	0.00060558
ENSG00000106852	LHX6	0.574076	0.00179493
ENSG00000141098	GFOD2	0.574124	0.000759892
ENSG00000132938	MTUS2	0.574133	0.00217071
ENSG00000074527	NTN4	0.574141	0.00321515
ENSG00000185909	KLHDC8B	0.574141	0.00108631
ENSG00000112306	RPS12	0.5742	0.0023685
ENSG00000171448	ZBTB26	0.574219	0.000650751
ENSG00000260081	AF274858.1	0.574239	0.00163857
ENSG00000125954	CHURC1-FNTB	0.574339	0.00114224
ENSG00000173757	STAT5B	0.57447	0.00164311
ENSG00000133134	BEX2	0.574494	0.00212444
ENSG00000067842	ATP2B3	0.574541	0.00203446
ENSG00000186260	MKL2	0.57457	0.00303652
ENSG00000182329	KIAA2012	0.574582	0.00134487
ENSG00000183828	NUDT14	0.574724	0.00152435
ENSG00000159450	TCHH	0.574814	0.00229344
ENSG00000176697	BDNF	0.575064	0.00209363
ENSG00000185361	TNFAIP8L1	0.575168	0.00242342
ENSG00000171004	HS6ST2	0.575263	0.00221151
ENSG00000185518	SV2B	0.575293	0.0026223
ENSG00000115350	POLE4	0.575302	0.00115042
ENSG00000212907	MT-ND4L	0.575325	0.0015834
ENSG00000270231	NBPF8	0.575442	0.000696445
ENSG00000114923	SLC4A3	0.575444	0.00200912
ENSG00000102931	ARL2BP	0.575484	0.000759346
ENSG00000038295	TLL1	0.575498	0.00112882
ENSG00000171813	PWWP2B	0.575596	0.00133229
ENSG00000146858	ZC3HAV1L	0.575645	0.00179148
ENSG00000106415	GLCCI1	0.575651	0.00110253
ENSG00000269621	AL589765.7	0.575676	0.00166943
ENSG00000116544	DLGAP3	0.575788	0.00166867
ENSG00000231764	DLX6-AS1	0.575869	0.00266599
ENSG00000138639	ARHGAP24	0.575881	0.00166943
ENSG00000080819	CPOX	0.575951	0.00259461
ENSG00000145087	STXBP5L	0.576	0.0027826
ENSG00000184731	FAM110C	0.576015	0.00101843
ENSG00000100225	FBXO7	0.576063	0.00221122
ENSG00000002330	BAD	0.576075	0.00127166
ENSG00000055950	MRPL43	0.576109	0.00110851
ENSG00000128285	MCHR1	0.576193	0.00256554
ENSG00000106328	FSCN3	0.576283	0.00226134
ENSG00000197106	SLC6A17	0.576317	0.00211717
ENSG00000100092	SH3BP1	0.576392	0.00297438
ENSG00000260918	AC107398.3	0.57648	0.00207192
ENSG00000072501	SMC1A	0.576491	0.00180686
ENSG00000107223	EDF1	0.576554	0.00407978
ENSG00000189129	PLAC9	0.576561	0.000950842
ENSG00000242485	MRPL20	0.576574	0.00109733
ENSG00000279592	AC010653.2	0.576589	0.00124868
ENSG00000166159	LRTM2	0.576611	0.00238691
ENSG00000175352	NRIP3	0.576637	0.002171
ENSG00000206557	TRIM71	0.576667	0.00143907
ENSG00000140391	TSPAN3	0.576812	0.00299789
ENSG00000125970	RALY	0.576821	0.00390754
ENSG00000104419	NDRG1	0.576853	0.00287925
ENSG00000185133	INPP5J	0.576892	0.0040242
ENSG00000142676	RPL11	0.576895	0.00314697
ENSG00000096060	FKBP5	0.576913	0.00350135
ENSG00000112796	ENPP5	0.576922	0.00243591
ENSG00000111752	PHC1	0.576926	0.00241528
ENSG00000161544	CYGB	0.576963	0.00180002
ENSG00000135083	CCNJL	0.577025	0.0016621
ENSG00000171724	VAT1L	0.577031	0.0029168
ENSG00000123352	SPATS2	0.57706	0.00191927
ENSG00000101158	NELFCD	0.577129	0.00216549
ENSG00000164402	SEPT8	0.577231	0.00203623
ENSG00000164270	HTR4	0.577256	0.00239397
ENSG00000167889	MGAT5B	0.57728	0.0016655
ENSG00000111596	CNOT2	0.577294	0.0023685
ENSG00000101190	TCFL5	0.577393	0.00216083
ENSG00000118495	PLAGL1	0.57742	0.00121051
ENSG00000160401	CFAP157	0.577548	0.00133177
ENSG00000023171	GRAMD1B	0.577587	0.0012662
ENSG00000259153	AC004816.1	0.577603	0.00161414
ENSG00000131018	SYNE1	0.577675	0.000747615
ENSG00000131969	ABHD12B	0.577788	0.00399709
ENSG00000249348	UGDH-AS1	0.577976	0.00149065
ENSG00000141404	GNAL	0.578001	0.00380542
ENSG00000065154	OAT	0.578034	0.0033001
ENSG00000203727	SAMD5	0.578036	0.00147481
ENSG00000253230	LINC00599	0.578056	0.000910371
ENSG00000260465	AC018557.1	0.578106	0.00235992
ENSG00000276547	PCDHGB5	0.578109	0.00332224
ENSG00000009709	PAX7	0.578118	0.00231233
ENSG00000129250	KIF1C	0.578181	0.00217071
ENSG00000261147	AC091167.2	0.578201	0.00633592
ENSG00000170653	ATF7	0.578274	0.00240311
ENSG00000112339	HBS1L	0.578343	0.00266136
ENSG00000105583	WDR83OS	0.578354	0.00112499
ENSG00000258674	AC011448.1	0.578381	0.00197617
ENSG00000174446	SNAPC5	0.578404	0.000965574
ENSG00000183722	LHFPL6	0.57848	0.000958463
ENSG00000119865	CNRIP1	0.578585	0.0046209
ENSG00000181350	LRRC75A	0.578587	0.000954351
ENSG00000237440	ZNF737	0.57862	0.00173454
ENSG00000260931	ENSG00000260931	0.578625	0.00243539
ENSG00000101134	DOK5	0.578645	0.00231867
ENSG00000225507	AC069282.1	0.578654	0.00147514
ENSG00000113845	TIMMDC1	0.578673	0.00301562
ENSG00000233175	AC008105.1	0.578684	0.00123644
ENSG00000101846	STS	0.578688	0.0023685
ENSG00000134825	TMEM258	0.578699	0.00615279
ENSG00000237515	SHISA9	0.578703	0.00633592
ENSG00000020922	MRE11	0.578712	0.00153982
ENSG00000231340	ACTG1P10	0.578733	0.00137024
ENSG00000079931	MOXD1	0.578811	0.00203446
ENSG00000113763	UNC5A	0.578828	0.00160262
ENSG00000130695	CEP85	0.578867	0.00240237
ENSG00000278948	AL031587.5	0.57892	0.00349358
ENSG00000145431	PDGFC	0.578968	0.000879777
ENSG00000105323	HNRNPUL1	0.578985	0.00344779
ENSG00000081377	CDC14B	0.579021	0.00152372
ENSG00000268120	AC010336.3	0.579065	0.00216869
ENSG00000128185	DGCR6L	0.579101	0.00176511
ENSG00000164082	GRM2	0.579103	0.00248535
ENSG00000186160	CYP4Z1	0.579111	0.00234322
ENSG00000196724	ZNF418	0.579138	0.00198249
ENSG00000143786	CNIH3	0.57914	0.003479
ENSG00000204599	TRIM39	0.579165	0.00353399
ENSG00000140807	NKD1	0.579167	0.000801962
ENSG00000280173	AC104447.1	0.579236	0.00217497
ENSG00000076826	CAMSAP3	0.579244	0.00192227
ENSG00000164442	CITED2	0.579362	0.00158487
ENSG00000186212	SOWAHB	0.579396	0.00159542
ENSG00000242950	ERVW-1	0.57941	0.00147184
ENSG00000116584	ARHGEF2	0.579442	0.00235828
ENSG00000180828	BHLHE22	0.579479	0.00207784
ENSG00000183454	GRIN2A	0.579538	0.00263715
ENSG00000274810	NPHP3-ACAD11	0.579539	0.000979842
ENSG00000273108	AL121929.2	0.57967	0.00134618
ENSG00000272072	AC004492.1	0.579706	0.00144284
ENSG00000231731	AC010976.1	0.579707	0.0010504
ENSG00000112218	GPR63	0.57971	0.00267607
ENSG00000107281	NPDC1	0.579805	0.00246458
ENSG00000140526	ABHD2	0.579806	0.00257471
ENSG00000150051	MKX	0.579807	0.00271623
ENSG00000276644	DACH1	0.579836	0.00280924
ENSG00000112137	PHACTR1	0.579887	0.00174681
ENSG00000147133	TAF1	0.579898	0.0050183
ENSG00000122691	TWIST1	0.579971	0.00274403
ENSG00000152082	MZT2B	0.580001	0.00115756
ENSG00000221983	UBA52	0.580022	0.00297962
ENSG00000100554	ATP6V1D	0.580051	0.000917504
ENSG00000182247	UBE2E2	0.580078	0.00390394
ENSG00000164919	COX6C	0.58011	0.00153511
ENSG00000170776	AKAP13	0.580125	0.00152691
ENSG00000177875	CCDC184	0.580183	0.00282318
ENSG00000152583	SPARCL1	0.58024	0.00233821
ENSG00000117155	SSX2IP	0.580297	0.00314666
ENSG00000226318	RPS3AP38	0.580333	0.00175079
ENSG00000125901	MRPS26	0.580357	0.00129233
ENSG00000155657	TTN	0.580359	0.00108059
ENSG00000158526	TSR2	0.580368	0.00229822
ENSG00000111452	ADGRD1	0.580378	0.00294605
ENSG00000174136	RGMB	0.580383	0.00348909
ENSG00000162631	NTNG1	0.58051	0.0017691
ENSG00000138617	PARP16	0.580517	0.00191087
ENSG00000186047	DLEU7	0.580534	0.00297438
ENSG00000099849	RASSF7	0.580618	0.000859731
ENSG00000233885	YEATS2-AS1	0.580673	0.0016959
ENSG00000181744	C3orf58	0.580692	0.00162938
ENSG00000138434	SSFA2	0.580698	0.002171
ENSG00000157911	PEX10	0.580841	0.00140352
ENSG00000213397	HAUS7	0.580855	0.00270414
ENSG00000107742	SPOCK2	0.580865	0.00317893
ENSG00000241360	PDXP	0.580901	0.00204965
ENSG00000171858	RPS21	0.580916	0.00139435
ENSG00000149541	B3GAT3	0.580997	0.00288812
ENSG00000258724	AC105001.2	0.581102	0.000887501
ENSG00000128524	ATP6V1F	0.58117	0.000952348
ENSG00000280165	PCDH20	0.581195	0.00503365
ENSG00000154975	CA10	0.581277	0.00163443
ENSG00000246451	AL049840.1	0.581293	0.00168908
ENSG00000143862	ARL8A	0.581399	0.00394345
ENSG00000002746	HECW1	0.58141	0.00314373
ENSG00000121851	POLR3GL	0.581469	0.00225993
ENSG00000276148	AC084824.5	0.581502	0.00242633
ENSG00000112038	OPRM1	0.581503	0.00114008
ENSG00000166501	PRKCB	0.58163	0.00392876
ENSG00000258824	AL122035.1	0.581734	0.000869486
ENSG00000155111	CDK19	0.581803	0.00392598
ENSG00000102572	STK24	0.581807	0.00320407
ENSG00000159164	SV2A	0.581875	0.00338809
ENSG00000104413	ESRP1	0.581895	0.00287551
ENSG00000186566	GPATCH8	0.581897	0.00154379
ENSG00000079156	OSBPL6	0.581968	0.00261053
ENSG00000125826	RBCK1	0.582008	0.00303245
ENSG00000004660	CAMKK1	0.582041	0.00280136
ENSG00000138759	FRAS1	0.58207	0.00298418
ENSG00000163161	ERCC3	0.582096	0.00104903
ENSG00000115828	QPCT	0.582117	0.00737584
ENSG00000131116	ZNF428	0.582307	0.00303245
ENSG00000136003	ISCU	0.582341	0.00201714
ENSG00000170445	HARS	0.582367	0.00105092
ENSG00000100603	SNW1	0.582487	0.0014628
ENSG00000070476	ZXDC	0.58252	0.00272549
ENSG00000273025	AC009690.3	0.582534	0.00219917
ENSG00000072315	TRPC5	0.58256	0.00218776
ENSG00000196562	SULF2	0.582562	0.00147481
ENSG00000214367	HAUS3	0.582686	0.00136635
ENSG00000197555	SIPA1L1	0.582717	0.00321128
ENSG00000134207	SYT6	0.582795	0.00119647
ENSG00000182256	GABRG3	0.582831	0.00299182
ENSG00000162069	BICDL2	0.58285	0.00350083
ENSG00000153814	JAZF1	0.582874	0.00698434
ENSG00000163075	CFAP221	0.582905	0.00240473
ENSG00000160688	FLAD1	0.582943	0.00152217
ENSG00000097096	SYDE2	0.582953	0.00342501
ENSG00000188559	RALGAPA2	0.582981	0.00165451
ENSG00000120217	CD274	0.583155	0.00134996
ENSG00000152595	MEPE	0.583227	0.00349358
ENSG00000128045	RASL11B	0.583246	0.00306604
ENSG00000076924	XAB2	0.583351	0.00239313
ENSG00000179195	ZNF664	0.583379	0.00289993
ENSG00000206579	XKR4	0.58339	0.00685721
ENSG00000159086	PAXBP1	0.583421	0.00470847
ENSG00000183091	NEB	0.583455	0.000929213
ENSG00000161981	SNRNP25	0.583462	0.00141575
ENSG00000186468	RPS23	0.583487	0.00258479
ENSG00000188848	BEND4	0.58352	0.00300908
ENSG00000114544	SLC41A3	0.583559	0.00136635
ENSG00000213619	NDUFS3	0.583564	0.00115542
ENSG00000235436	DPY19L2P4	0.58357	0.00242342
ENSG00000123119	NECAB1	0.583609	0.0029709
ENSG00000155287	SLC25A28	0.583756	0.00311213
ENSG00000140798	ABCC12	0.583863	0.00282316
ENSG00000156482	RPL30	0.583934	0.00378387
ENSG00000079102	RUNX1T1	0.583943	0.00139435
ENSG00000142634	EFHD2	0.583986	0.00402255
ENSG00000144724	PTPRG	0.584002	0.00305276
ENSG00000248859	LINC01574	0.584102	0.00204868
ENSG00000115207	GTF3C2	0.584204	0.00259809
ENSG00000076351	SLC46A1	0.584209	0.00130195
ENSG00000143952	VPS54	0.584238	0.00307595
ENSG00000100568	VTI1B	0.584374	0.00295898
ENSG00000153815	CMIP	0.584423	0.00303334
ENSG00000198938	MT-CO3	0.58444	0.00199876
ENSG00000109475	RPL34	0.584463	0.00229822
ENSG00000120322	PCDHB8	0.584497	0.00210496
ENSG00000165028	NIPSNAP3B	0.584594	0.00249648
ENSG00000210082	MT-RNR2	0.584615	0.00475698
ENSG00000151414	NEK7	0.584623	0.00263332
ENSG00000176225	RTTN	0.584644	0.00247702
ENSG00000235954	TTC28-AS1	0.584681	0.00143891
ENSG00000053524	MCF2L2	0.584761	0.00920264
ENSG00000187239	FNBP1	0.584849	0.00280136
ENSG00000108107	RPL28	0.584934	0.00445063
ENSG00000256542	AC148477.2	0.58497	0.00129784
ENSG00000261732	AL031708.1	0.584988	0.0023685
ENSG00000170248	PDCD6IP	0.585021	0.00101607
ENSG00000174917	C19orf70	0.585035	0.00190989
ENSG00000120253	NUP43	0.585046	0.00367157
ENSG00000174437	ATP2A2	0.585093	0.00477508
ENSG00000173660	UQCRH	0.585094	0.00177726
ENSG00000139985	ADAM21	0.585162	0.00303245
ENSG00000138468	SENP7	0.585203	0.00117047
ENSG00000119720	NRDE2	0.585234	0.00297962
ENSG00000171456	ASXL1	0.585238	0.00380083
ENSG00000001167	NFYA	0.5853	0.002171
ENSG00000148450	MSRB2	0.585351	0.00380768
ENSG00000101003	GINS1	0.585539	0.00234498
ENSG00000243888	AL355140.1	0.585557	0.00361531
ENSG00000187240	DYNC2H1	0.585564	0.00154313
ENSG00000178234	GALNT11	0.585631	0.00430221
ENSG00000127540	UQCR11	0.585658	0.00183769
ENSG00000128594	LRRC4	0.585676	0.00302978
ENSG00000113361	CDH6	0.585702	0.00353399
ENSG00000169621	APLF	0.585714	0.00204178
ENSG00000273420	AC008738.7	0.585755	0.00157715
ENSG00000203993	ARRDC1-AS1	0.585951	0.00303262
ENSG00000115290	GRB14	0.585973	0.0030001
ENSG00000003393	ALS2	0.586008	0.00192413
ENSG00000204220	PFDN6	0.586034	0.00347945
ENSG00000161021	MAML1	0.586035	0.00590812
ENSG00000130779	CLIP1	0.586074	0.00175541
ENSG00000249158	PCDHA11	0.586077	0.00427109
ENSG00000184209	SNRNP35	0.586094	0.00430221
ENSG00000136908	DPM2	0.586139	0.00664293
ENSG00000165716	FAM69B	0.586152	0.00258479
ENSG00000109790	KLHL5	0.586159	0.00305276
ENSG00000162664	ZNF326	0.586173	0.00276144
ENSG00000265787	CYP4F35P	0.586177	0.00218776
ENSG00000167912	AC090152.1	0.586199	0.00267607
ENSG00000243725	TTC4	0.58626	0.00248535
ENSG00000127914	AKAP9	0.586335	0.0010079
ENSG00000166508	MCM7	0.586365	0.00297438
ENSG00000165678	GHITM	0.586444	0.00620297
ENSG00000110076	NRXN2	0.586457	0.00160198
ENSG00000116747	TROVE2	0.586462	0.00163392
ENSG00000120645	IQSEC3	0.586482	0.0029399
ENSG00000073150	PANX2	0.586565	0.0019244
ENSG00000154945	ANKRD40	0.586612	0.0026399
ENSG00000189420	ZFP92	0.586695	0.00402373
ENSG00000135127	BICDL1	0.586789	0.00261879
ENSG00000142534	RPS11	0.58685	0.00301562
ENSG00000205268	PDE7A	0.586876	0.00610589
ENSG00000198315	ZKSCAN8	0.586999	0.00166132
ENSG00000171695	LKAAEAR1	0.587015	0.00168908
ENSG00000125869	LAMP5	0.587041	0.00391928
ENSG00000248367	AC008610.1	0.58707	0.00163443
ENSG00000011143	MKS1	0.58714	0.00303262
ENSG00000166860	ZBTB39	0.587144	0.00105092
ENSG00000182628	SKA2	0.587152	0.00427109
ENSG00000173113	TRMT112	0.587155	0.00298287
[truncated: 2,841 more rows]

## Sheet: sd_ratio > 1
	gene_symbol	SD_ratio	adjusted p-value
ENSG00000248671	ALG1L9P	1.47208	0.0355345
ENSG00000126522	ASL	1.47869	0.0443332
ENSG00000213614	HEXA	1.49693	0.0385343
ENSG00000135047	CTSL	1.50276	0.0262279
ENSG00000163359	COL6A3	1.51001	0.0315094
ENSG00000117984	CTSD	1.51251	0.0313491
ENSG00000172296	SPTLC3	1.51965	0.0258653
ENSG00000164733	CTSB	1.52233	0.0213649
ENSG00000100600	LGMN	1.54951	0.0143514
ENSG00000186834	HEXIM1	1.55351	0.0211863
ENSG00000177352	CCDC71	1.57249	0.0121158
ENSG00000106809	OGN	1.59482	0.00993786
ENSG00000124107	SLPI	1.60535	0.00727324
ENSG00000064601	CTSA	1.61962	0.00733261
ENSG00000066827	ZFAT	1.63075	0.00422945
ENSG00000101294	HM13	1.64812	0.00375619
ENSG00000168542	COL3A1	1.76833	0.000668986
ENSG00000142494	SLC47A1	1.79596	0.000573711
ENSG00000119681	LTBP2	1.81347	0.000456502
